# Supplementary material
Source: PubMed Central journal article supplement (PMC2988197)
Supplement: NIHMS33166-supplement-supplementary_tables.pdf [file NIHMS33166-supplement-supplementary_tables.pdf]

## SUPPLEMENTARY INFORMATION

Supplementary Table 1. Bristle prescreen results

| JM  | Number | Construct | Transformant | CG number | Gene        | Symbol                     | Gene Synonyms | GAL 4 line | Temp | Phenotype Colour | Phenotype                                                                 | Comment   |
|-----|--------|-----------|--------------|-----------|-------------|----------------------------|---------------|------------|------|------------------|---------------------------------------------------------------------------|-----------|
| 19  | 122G6  | T2        |              | CG5462    | scrib       | scribbled                  |               | fz3        | 29   | Black            | extra M at scutellum                                                      |           |
| 20  | 122G6  | T3        |              | CG5462    | scrib       | scribbled                  |               | fz3        | 29   | Black            | no phenotype                                                              |           |
| 21  | 122G6  | T4        |              | CG5462    | scrib       | scribbled                  |               | fz3        | 29   | Black            | lethal                                                                    |           |
| 22  | 123A4  | T1        |              | CG5692    | raps        | rapsynoid                  |               | fz3        | 25   | Black            | empty sockets                                                             |           |
| 23  | 123A7  |           |              | CG5771    | Rab11       | Rab-protein 11             |               | fz3        | 29   | Black            | lethal                                                                    |           |
| 32  | 129E3  |           |              | CG7867    | nuf         | nuclear fallout            |               | fz3        | 29   | Black            | no phenotype                                                              |           |
| 33  | 129E3  |           |              | CG7867    | nuf         | nuclear fallout            |               | fz3        | 29   | Black            | no phenotype                                                              |           |
| 34  | 12H12  | T3        |              | CG4482    | mol         | moladletz n/p CG15268      |               | fz3        | 29   | Black            | no phenotype                                                              |           |
| 35  | 122G6  | T1        |              | CG5462    | scrib       | scribbled                  |               | fz3        | 29   | Black            | lethal                                                                    |           |
| 52  | 14B5   | T2        |              | CG5248    | loco        | CG17229 locomotion defects |               | fz3        | 29   | Black            | no phenotype                                                              |           |
| 53  | 14B5   | T3        |              | CG5248    | loco        | CG17229 locomotion defects |               | fz3        | 29   | Black            | rare loss of M                                                            |           |
| 54  | 14B5   | T4        |              | CG5248    | loco        | CG17229 locomotion defects |               | fz3        | 29   | Black            | no phenotype                                                              |           |
| 58  | 15H5   | T2        |              | CG5055    | baz         | Par3                       |               | fz3        | 29   | Yellow           | gain and loss M on same fly                                               |           |
| 59  | 15H5   | T1        |              | CG5055    | baz         | Par3                       |               | fz3        | 29   | Yellow           | duplicated hairs and loss                                                 |           |
| 60  |        |           |              |           | white minus |                            |               | fz3        | 29   | Black            | no phenotype                                                              |           |
| 61  | 16C8   | T1        |              | CG3779    | numb        | nb                         |               | fz3        | 29   | Black            | empty or multiple sockets                                                 |           |
| 66  | 2B7    | T1        |              | CG3619    | DI          | Delta                      |               | fz3        | 29   | Black            | lethal                                                                    |           |
| 67  | 2B7    | T1        |              | CG3619    | DI          | Delta                      |               | fz3        | 29   | Black            | adults die in food, gain of bristles                                      |           |
| 68  | 2B7    | T2        |              | CG3619    | DI          | Delta                      |               | fz3        | 29   | Black            | adults die in food                                                        |           |
| 69  | 2B7    | T2        |              | CG3619    | DI          | Delta                      |               | fz3        | 29   | Black            | adults die in food, gain of bristles                                      |           |
| 70  | 2H6    | T1        |              | CG3936    | N           | Notch split                |               | fz3        | 29   | Black            | lethal, escapers mid gain of bristles                                     |           |
| 71  | 2C7    |           |              | CG6127    | Ser         | Serrate Beaded Ripped wing |               | fz3        | 29   | Black            | adults die in food, pupal lethal                                          |           |
| 72  | 2H6    | T1        |              | CG3936    | N           | Notch split                |               | fz3        | 29   | Black            | lethal                                                                    |           |
| 73  | 32B1   | T1        |              | CG1539    | spdo        | sanpodo CG1149 3CG15540    |               | fz3        | 29   | Black            | mid loss and rare duplication of hairs                                    |           |
| 74  | 32B8   | T1        |              | CG1539    | spdo        | sanpodo CG1149 3CG15540    |               | fz3        | 29   | Black            | no phenotype                                                              |           |
| 77  | 3D8    | T1        |              | CG7012    | nct         | nicastrin agro             |               | fz3        | 29   | Black            | no phenotype                                                              |           |
| 78  | 3D8    | T2        |              | CG7012    | nct         | nicastrin agro             |               | fz3        | 29   | Black            | no phenotype                                                              |           |
| 79  | 43H2   | T1        |              | CG5884    | par-6       | par-6                      |               | fz3        | 29   | Black            | lethal                                                                    |           |
| 80  | 43H2   | T2        |              | CG5884    | par-6       | par-6                      |               | fz3        | 29   | Black            | lethal                                                                    |           |
| 81  | 47B8   | T3        |              | CG11988   | neur        | neutralized                |               | fz3        | 29   | Black            | mid gain of bristles on head                                              |           |
| 82  | 47B8   | T4        |              | CG11988   | neur        | neutralized                |               | fz3        | 29   | Black            | mid gain of bristles on head, M only                                      |           |
| 83  | 47B8   |           |              | CG11988   | neur        | neutralized                |               | fz3        | 29   | Black            | gain of bristles, duplicated hairs, both head and notum                   |           |
| 86  | 49H2   | T1        |              | CG5868    | psn         | Presentin Dps CG18803      |               | fz3        | 29   | Black            | lethal                                                                    |           |
| 124 | 16B7   | T1        |              | CG5089    | msi         |                            |               | fz3        | 29   | Black            | lethal                                                                    |           |
| 125 | 17H1   | T2        |              | CG3497    | Su(H)       |                            |               | fz3        | 29   | Black            | not checked                                                               | bad cross |
| 126 | 17H1   | T3        |              | CG3497    | Su(H)       |                            |               | fz3        | 29   | Black            | no phenotype                                                              |           |
| 141 | 15F3   | T2        |              | CG10261   | aPKC        |                            |               | fz3        | 29   | Black            | lethal                                                                    |           |
| 144 | 14B5   | T2        |              | CG5248    | loco        | CG17229                    |               | fz3        | 29   | Black            | no phenotype                                                              |           |
| 146 | 130D8  | T1        |              | CG3258    | ase         |                            |               | fz3        | 29   | Black            | no phenotype                                                              |           |
| 147 | 130D8  | T2        |              | CG3258    | ase         |                            |               | fz3        | 29   | Black            | no phenotype                                                              |           |
| 148 | 130D8  | T3        |              | CG3258    | ase         |                            |               | fz3        | 29   | Black            | no phenotype                                                              |           |
| 19  | 122G6  | T2        |              | CG5462    | scrib       | scribbled                  |               | fz3        | 25   | Black            | loss of M on head                                                         |           |
| 20  | 122G6  | T3        |              | CG5462    | scrib       | scribbled                  |               | fz3        | 25   | Black            | loss of M on head                                                         |           |
| 21  | 122G6  | T4        |              | CG5462    | scrib       | scribbled                  |               | fz3        | 25   | Black            | lethal                                                                    |           |
| 22  | 123A4  | T1        |              | CG5692    | raps        | rapsynoid                  |               | fz3        | 25   | Black            | rare loss of m and empty/multiple sockets                                 |           |
| 23  | 123A7  |           |              | CG5771    | Rab11       | Rab-protein 11             |               | fz3        | 25   | Black            | lethal                                                                    |           |
| 32  | 129E3  |           |              | CG7867    | nuf         | nuclear fallout            |               | fz3        | 25   | Black            | not checked                                                               |           |
| 33  | 129E3  |           |              | CG7867    | nuf         | nuclear fallout            |               | fz3        | 25   | Black            | not checked                                                               |           |
| 34  | 12H12  | T3        |              | CG4482    | mol         | moladletz n/p CG15268      |               | fz3        | 25   | Black            | not checked                                                               |           |
| 35  | 122G6  | T1        |              | CG5462    | scrib       | scribbled                  |               | fz3        | 25   | Black            | lethal                                                                    |           |
| 52  | 14B5   | T2        |              | CG5248    | loco        | CG17229 locomotion defects |               | fz3        | 25   | Black            | no phenotype                                                              |           |
| 53  | 14B5   | T3        |              | CG5248    | loco        | CG17229 locomotion defects |               | fz3        | 25   | Black            | rare loss of m and empty/multiple sockets                                 |           |
| 54  | 14B5   | T4        |              | CG5248    | loco        | CG17229 locomotion defects |               | fz3        | 25   | Black            | no phenotype                                                              |           |
| 58  | 15H5   | T2        |              | CG5055    | baz         | Par3                       |               | fz3        | 25   | Black            | no phenotype                                                              |           |
| 59  | 15H5   | T1        |              | CG5055    | baz         | Par3                       |               | fz3        | 25   | Black            | loss of m and duplicated hairs                                            |           |
| 60  |        |           |              |           | white minus |                            |               | fz3        | 25   | Black            | no phenotype                                                              |           |
| 61  | 16C8   | T1        |              | CG3779    | numb        | nb                         |               | fz3        | 25   | Black            | empty or multiple sockets, M only, head and notum                         |           |
| 66  | 2B7    | T1        |              | CG3619    | DI          | Delta                      |               | fz3        | 25   | Black            | gain of bristles, head and notum                                          |           |
| 67  | 2B7    | T1        |              | CG3619    | DI          | Delta                      |               | fz3        | 25   | Black            | adults die in food, gain of bristles                                      |           |
| 68  | 2B7    | T2        |              | CG3619    | DI          | Delta                      |               | fz3        | 25   | Black            | gain of bristles                                                          |           |
| 69  | 2B7    | T2        |              | CG3619    | DI          | Delta                      |               | fz3        | 25   | Black            | gain of bristles                                                          |           |
| 70  | 2H6    | T1        |              | CG3936    | N           | Notch split                |               | fz3        | 25   | Black            | adults die in food, escapers have no phenotype                            |           |
| 71  | 2C7    |           |              | CG6127    | Ser         | Serrate Beaded Ripped wing |               | fz3        | 25   | Black            | lethal, escapers with rare gain of bristles                               |           |
| 72  | 2H6    | T1        |              | CG3936    | N           | Notch split                |               | fz3        | 25   | Black            | lethal                                                                    |           |
| 73  | 32B1   | T1        |              | CG1539    | spdo        | sanpodo CG1149 3CG15540    |               | fz3        | 25   | Black            | no phenotype                                                              |           |
| 74  | 32B8   | T1        |              | CG1539    | spdo        | sanpodo CG1149 3CG15540    |               | fz3        | 25   | Black            | no phenotype                                                              |           |
| 77  | 3D8    | T1        |              | CG7012    | nct         | nicastrin agro             |               | fz3        | 25   | Black            | not checked                                                               |           |
| 78  | 3D8    | T2        |              | CG7012    | nct         | nicastrin agro             |               | fz3        | 25   | Black            | not checked                                                               |           |
| 79  | 43H2   | T1        |              | CG5884    | par-6       | par-6                      |               | fz3        | 25   | Black            | not checked                                                               | bad cross |
| 80  | 43H2   | T2        |              | CG5884    | par-6       | par-6                      |               | fz3        | 25   | Black            | not checked                                                               | bad cross |
| 81  | 47B8   | T3        |              | CG11988   | neur        | neutralized                |               | fz3        | 25   | Black            | no phenotype                                                              |           |
| 82  | 47B8   | T4        |              | CG11988   | neur        | neutralized                |               | fz3        | 25   | Black            | no phenotype                                                              |           |
| 83  | 47B8   |           |              | CG11988   | neur        | neutralized                |               | fz3        | 25   | Black            | no phenotype                                                              |           |
| 86  | 49H2   | T1        |              | CG5868    | psn         | Presentin Dps CG18803      |               | fz3        | 25   | Black            | strong loss of bristles, m only                                           |           |
| 124 | 16B7   | T1        |              | CG5089    | msi         |                            |               | fz3        | 25   | Black            | empty or multiple sockets                                                 |           |
| 125 | 17H1   | T2        |              | CG3497    | Su(H)       |                            |               | fz3        | 25   | Black            | not checked                                                               | bad cross |
| 126 | 17H1   | T3        |              | CG3497    | Su(H)       |                            |               | fz3        | 25   | Black            | no phenotype                                                              |           |
| 141 | 15F3   | T2        |              | CG10261   | aPKC        |                            |               | fz3        | 25   | Black            | loss of bristles and gain of bristles on same fly                         |           |
| 144 | 14B5   | T2        |              | CG5248    | loco        | CG17229                    |               | fz3        | 25   | Black            | no phenotype                                                              |           |
| 146 | 130D8  | T1        |              | CG3258    | ase         |                            |               | fz3        | 25   | Black            | no phenotype                                                              |           |
| 147 | 130D8  | T2        |              | CG3258    | ase         |                            |               | fz3        | 25   | Black            | no phenotype                                                              |           |
| 148 | 130D8  | T3        |              | CG3258    | ase         |                            |               | fz3        | 25   | Black            | no phenotype                                                              |           |
| 19  | 122G6  | T3        |              | CG5462    | scrib       | scribbled                  |               | fz3        | 18   | Black            | loss of M on head                                                         |           |
| 21  | 122G6  | T4        |              | CG5462    | scrib       | scribbled                  |               | fz3        | 18   | Black            | lethal                                                                    |           |
| 22  | 123A4  | T1        |              | CG5692    | raps        | rapsynoid                  |               | fz3        | 18   | Black            | no phenotype                                                              |           |
| 23  | 123A7  |           |              | CG5771    | Rab11       | Rab-protein 11             |               | fz3        | 18   | Black            | lethal, escapers no phenotype                                             |           |
| 32  | 129E3  |           |              | CG7867    | nuf         | nuclear fallout            |               | fz3        | 18   | Black            | not checked                                                               |           |
| 33  | 129E3  |           |              | CG7867    | nuf         | nuclear fallout            |               | fz3        | 18   | Black            | not checked                                                               |           |
| 34  | 12H12  | T3        |              | CG4482    | mol         | moladletz n/p CG15268      |               | fz3        | 18   | Black            | not checked                                                               |           |
| 35  | 122G6  | T1        |              | CG5462    | scrib       | scribbled                  |               | fz3        | 18   | Black            | lethal                                                                    |           |
| 52  | 14B5   | T2        |              | CG5248    | loco        | CG17229 locomotion defects |               | fz3        | 18   | Black            | not checked                                                               |           |
| 53  | 14B5   | T3        |              | CG5248    | loco        | CG17229 locomotion defects |               | fz3        | 18   | Black            | no phenotype                                                              |           |
| 54  | 14B5   | T4        |              | CG5248    | loco        | CG17229 locomotion defects |               | fz3        | 18   | Black            | not checked                                                               |           |
| 58  | 15H5   | T2        |              | CG5055    | baz         | Par3                       |               | fz3        | 18   | Black            | no phenotype                                                              |           |
| 59  | 15H5   | T1        |              | CG5055    | baz         | Par3                       |               | fz3        | 18   | Black            | duplicated hairs                                                          |           |
| 60  |        |           |              |           | white minus |                            |               | fz3        | 18   | Black            | no phenotype                                                              |           |
| 61  | 16C8   | T1        |              | CG3779    | numb        | nb                         |               | fz3        | 18   | Black            | empty or multiple sockets, mostly M, some m affected                      |           |
| 66  | 2B7    | T1        |              | CG3619    | DI          | Delta                      |               | fz3        | 18   | Black            | strong gain of bristles, m only                                           |           |
| 67  | 2B7    | T1        |              | CG3619    | DI          | Delta                      |               | fz3        | 18   | Black            | gain of bristles, m only                                                  |           |
| 68  | 2B7    | T2        |              | CG3619    | DI          | Delta                      |               | fz3        | 18   | Black            | gain of bristles, m only                                                  |           |
| 69  | 2B7    | T2        |              | CG3619    | DI          | Delta                      |               | fz3        | 18   | Black            | gain of bristles, m only                                                  |           |
| 70  | 2H6    | T1        |              | CG3936    | N           | Notch split                |               | fz3        | 18   | Black            | gain of bristles, m only                                                  |           |
| 71  | 2C7    |           |              | CG6127    | Ser         | Serrate Beaded Ripped wing |               | fz3        | 18   | Black            | no phenotype                                                              |           |
| 72  | 2H6    | T1        |              | CG3936    | N           | Notch split                |               | fz3        | 18   | Black            | lethal, escapers no phenotype                                             |           |
| 73  | 32B1   | T1        |              | CG1539    | spdo        | sanpodo CG1149 3CG15540    |               | fz3        | 18   | Black            | not checked                                                               |           |
| 74  | 32B8   | T1        |              | CG1539    | spdo        | sanpodo CG1149 3CG15540    |               | fz3        | 18   | Black            | no phenotype                                                              |           |
| 77  | 3D8    | T1        |              | CG7012    | nct         | nicastrin agro             |               | fz3        | 18   | Black            | not checked                                                               |           |
| 78  | 3D8    | T2        |              | CG7012    | nct         | nicastrin agro             |               | fz3        | 18   | Black            | not checked                                                               |           |
| 79  | 43H2   | T1        |              | CG5884    | par-6       | par-6                      |               | fz3        | 18   | Black            | not checked                                                               |           |
| 80  | 43H2   | T2        |              | CG5884    | par-6       | par-6                      |               | fz3        | 18   | Black            | not checked                                                               |           |
| 81  | 47B8   | T3        |              | CG11988   | neur        | neutralized                |               | fz3        | 18   | Black            | no phenotype                                                              | bad cross |
| 82  | 47B8   | T4        |              | CG11988   | neur        | neutralized                |               | fz3        | 18   | Black            | no phenotype                                                              | bad cross |
| 83  | 47B8   |           |              | CG11988   | neur        | neutralized                |               | fz3        | 18   | Black            | no phenotype                                                              |           |
| 86  | 49H2   | T1        |              | CG5868    | psn         | Presentin Dps CG18803      |               | fz3        | 18   | Black            | loss of m                                                                 |           |
| 124 | 16B7   | T1        |              | CG5089    | msi         |                            |               | fz3        | 18   | Black            | empty or multiple sockets, rare duplicated M                              |           |
| 125 | 17H1   | T2        |              | CG3497    | Su(H)       |                            |               | fz3        | 18   | Black            | no phenotype                                                              |           |
| 126 | 17H1   | T3        |              | CG3497    | Su(H)       |                            |               | fz3        | 18   | Black            | not checked                                                               |           |
| 141 | 15F3   | T2        |              | CG10261   | aPKC        |                            |               | fz3        | 18   | Black            | no phenotype                                                              |           |
| 144 | 14B5   | T2        |              | CG5248    | loco        | CG17229                    |               | fz3        | 18   | Black            | no phenotype                                                              |           |
| 146 | 130D8  | T1        |              | CG3258    | ase         |                            |               | fz3        | 18   | Black            | not checked                                                               |           |
| 147 | 130D8  | T2        |              | CG3258    | ase         |                            |               | fz3        | 18   | Black            | not checked                                                               |           |
| 148 | 130D8  | T3        |              | CG3258    | ase         |                            |               | fz3        | 18   | Black            | not checked                                                               |           |
| 19  | 122G6  | T2        |              | CG5462    | scrib       | scribbled                  |               | pnr        | 29   | Black            | empty socket, short hairs, some remnants of hairs, loss of M at scutellum |           |
| 20  | 122G6  | T3        |              | CG5462    | scrib       | scribbled                  |               | pnr        | 29   | Black            | bristle morphology defects                                                |           |
| 21  | 122G6  | T4        |              | CG5462    | scrib       | scribbled                  |               | pnr        | 29   | Black            | lethal                                                                    |           |
| 22  | 123A4  | T1        |              | CG5692    | raps        | rapsynoid                  |               | pnr        | 29   | Black            | loss of m and empty sockets                                               |           |
| 23  | 123A7  |           |              | CG5771    | Rab11       | Rab-protein 11             |               | pnr        | 29   | Black            | no phenotype                                                              |           |
| 32  | 129E3  |           |              | CG7867    | nuf         | nuclear fallout            |               | pnr        | 29   | Black            | no phenotype                                                              |           |

Supplementary Table 1

| JM Number | Construct | Transformant | CG number | Gene Symbol | Gene Synonyms              | GAL4 line | Temp | Phenotype Colour | Phenotype                                                        | Comment   |
|-----------|-----------|--------------|-----------|-------------|----------------------------|-----------|------|------------------|------------------------------------------------------------------|-----------|
| 33        | 129E3     |              | CG7867    | nuf         | nuclear fallout            | pnr       | 29   |                  | not checked                                                      |           |
| 34        | 12H12     | T3           | CG4482    | mol         | moladi etz nlp CG15268     | pnr       | 29   |                  | no phenotype                                                     | bad cross |
| 45        | 122G6     | T1           | CG5462    | scrib       | scribbled                  | pnr       | 29   |                  | lethal                                                           |           |
| 52        | 14B5      | T2           | CG5248    | loco        | CG17229 locomotion defects | pnr       | 29   |                  | no phenotype                                                     |           |
| 53        | 14B5      | T3           | CG5248    | loco        | CG17229 locomotion defects | pnr       | 29   |                  | loss of m and empty sockets                                      |           |
| 54        | 14B5      | T4           | CG5248    | loco        | CG17229 locomotion defects | pnr       | 29   |                  | no phenotype                                                     |           |
| 58        | 15H5      | T2           | CG5055    | baz         | Par3                       | pnr       | 29   |                  | duplicated hairs and loss                                        |           |
| 59        | 15H5      | T1           | CG5055    | baz         | Par3                       | pnr       | 29   |                  | duplicated hairs and loss                                        |           |
| 60        |           |              |           | white minus |                            | pnr       | 29   |                  | no phenotype                                                     |           |
| 61        | 16C8      | T1           | CG3779    | numb        | nb                         | pnr       | 29   |                  | strong empty or multiple sockets                                 |           |
| 66        | 2B7       | T1           | CG3619    | Di          | Delta                      | pnr       | 29   |                  | strong gain of bristles                                          |           |
| 67        | 2B7       | T1           | CG3619    | Di          | Delta                      | pnr       | 29   |                  | strong gain of bristles                                          |           |
| 68        | 2B7       | T2           | CG3619    | Di          | Delta                      | pnr       | 29   |                  | strong gain of bristles                                          |           |
| 69        | 2B7       | T2           | CG3619    | Di          | Delta                      | pnr       | 29   |                  | strong gain of bristles                                          |           |
| 70        | 2H6       | T1           | CG3936    | N           | Notch split                | pnr       | 29   |                  | notum death malformation, loss of bristles, duplicated hairs     |           |
| 71        | 2C7       |              | CG6127    | Ser         | Serrate Beaded Ripped wing | pnr       | 29   |                  | no phenotype                                                     |           |
| 72        | 2H6       | T1           | CG3936    | N           | Notch split                | pnr       | 29   |                  | notum death malformation, loss of bristles                       |           |
| 73        | 32B1      | T1           | CG1539    | spdo        | sanpodo CG1149 3CG15540    | pnr       | 29   |                  | stronger loss of bristles, rare duplication of hairs             |           |
| 74        | 32B8      | T1           | CG1539    | spdo        | sanpodo CG1149 3CG15540    | pnr       | 29   |                  | no phenotype                                                     |           |
| 77        | 3D8       | T1           | CG7012    | nct         | nica strin agro            | pnr       | 29   |                  | no phenotype                                                     |           |
| 78        | 3D8       | T2           | CG7012    | nct         | nica strin agro            | pnr       | 29   |                  | no phenotype                                                     |           |
| 79        | 43H2      | T1           | CG5884    | par-6       | par-6                      | pnr       | 29   |                  | lethal                                                           |           |
| 80        | 43H2      | T2           | CG5884    | par-6       | par-6                      | pnr       | 29   |                  | lethal                                                           |           |
| 81        | 47B8      | T3           | CG11988   | neur        | neurallized                | pnr       | 29   |                  | gain of bristles, duplicated hairs                               |           |
| 82        | 47B8      | T4           | CG11988   | neur        | neurallized                | pnr       | 29   |                  | mid gain of bristles on head and notum                           |           |
| 83        | 47B8      |              | CG11988   | neur        | neurallized                | pnr       | 29   |                  | gain of bristles, duplicated hairs                               |           |
| 86        | 49H2      | T1           | CG5888    | psn         | Presentin Dps CG18803      | pnr       | 29   |                  | strong loss of bristles                                          |           |
| 124       | 16B7      | T1           | CG5099    | msi         | msi                        | pnr       | 29   |                  | strong duplication of hairs and empty/multiple sockets           |           |
| 125       | 17H1      | T2           | CG3497    | Su(H)       | Su(H)                      | pnr       | 29   |                  | no phenotype                                                     |           |
| 126       | 17H1      | T3           | CG3497    | Su(H)       | Su(H)                      | pnr       | 29   |                  | no phenotype                                                     |           |
| 141       | 15F3      | T2           | CG10261   | aPKC        | aPKC                       | pnr       | 29   |                  | lethal                                                           |           |
| 144       | 14B5      | T2           | CG5248    | loco        | CG17229                    | pnr       | 29   |                  | rare empty sockets                                               |           |
| 146       | 130D8     | T1           | CG3258    | ase         | ase                        | pnr       | 29   |                  | no phenotype                                                     |           |
| 147       | 130D8     | T2           | CG3258    | ase         | ase                        | pnr       | 29   |                  | rare multiple sockets, loss of bristles                          |           |
| 148       | 130D8     | T3           | CG3258    | ase         | ase                        | pnr       | 29   |                  | no phenotype                                                     |           |
| 19        | 122G6     | T2           | CG5462    | scrib       | scribbled                  | pnr       | 25   |                  | loss of notum m and empty sockets                                |           |
| 20        | 122G6     | T3           | CG5462    | scrib       | scribbled                  | pnr       | 25   |                  | are loss of notum m and empty sockets                            |           |
| 21        | 122G6     | T4           | CG5462    | scrib       | scribbled                  | pnr       | 25   |                  | lethal                                                           |           |
| 22        | 123A4     | T1           | CG5892    | raps        | rapsynoid                  | pnr       | 25   |                  | loss of m and empty/multiple sockets                             |           |
| 23        | 123A7     |              | CG5771    | Rab11       | Rab-protein 11             | pnr       | 25   |                  | lethal?                                                          |           |
| 32        | 129E3     |              | CG7867    | nuf         | nuclear fallout            | pnr       | 25   |                  | not checked                                                      |           |
| 33        | 129E3     |              | CG7867    | nuf         | nuclear fallout            | pnr       | 25   |                  | not checked                                                      |           |
| 34        | 12H12     | T3           | CG4482    | mol         | moladi etz nlp CG15268     | pnr       | 25   |                  | not checked                                                      |           |
| 35        | 122G6     | T1           | CG5462    | scrib       | scribbled                  | pnr       | 25   |                  | lethal                                                           |           |
| 52        | 14B5      | T2           | CG5248    | loco        | CG17229 locomotion defects | pnr       | 25   |                  | no phenotype                                                     |           |
| 53        | 14B5      | T3           | CG5248    | loco        | CG17229 locomotion defects | pnr       | 25   |                  | rare loss of m and empty/multiple sockets                        |           |
| 54        | 14B5      | T4           | CG5248    | loco        | CG17229 locomotion defects | pnr       | 25   |                  | no phenotype                                                     |           |
| 58        | 15H5      | T2           | CG5055    | baz         | Par3                       | pnr       | 25   |                  | loss of m and rare empty/multiple sockets, rare duplicated hairs |           |
| 59        | 15H5      | T1           | CG5055    | baz         | Par3                       | pnr       | 25   |                  | loss of m and duplicated hairs                                   |           |
| 60        |           |              |           | white minus |                            | pnr       | 25   |                  | no phenotype                                                     |           |
| 61        | 16C8      | T1           | CG3779    | numb        | nb                         | pnr       | 25   |                  | strong empty or multiple sockets                                 |           |
| 66        | 2B7       | T1           | CG3619    | Di          | Delta                      | pnr       | 25   |                  | strong gain of bristles                                          |           |
| 67        | 2B7       | T1           | CG3619    | Di          | Delta                      | pnr       | 25   |                  | gain of bristles, m only                                         |           |
| 68        | 2B7       | T2           | CG3619    | Di          | Delta                      | pnr       | 25   |                  | gain of bristles                                                 |           |
| 69        | 2B7       | T2           | CG3619    | Di          | Delta                      | pnr       | 25   |                  | gain of bristles                                                 |           |
| 70        | 2H6       | T1           | CG3936    | N           | Notch split                | pnr       | 25   |                  | gain of bristles, some notum death malformation                  |           |
| 71        | 2C7       |              | CG6127    | Ser         | Serrate Beaded Ripped wing | pnr       | 25   |                  | no phenotype                                                     |           |
| 72        | 2H6       | T1           | CG3936    | N           | Notch split                | pnr       | 25   |                  | notum death malformation, loss of bristles                       |           |
| 73        | 32B1      | T1           | CG1539    | spdo        | sanpodo CG1149 3CG15540    | pnr       | 25   |                  | no phenotype                                                     |           |
| 74        | 32B8      | T1           | CG1539    | spdo        | sanpodo CG1149 3CG15540    | pnr       | 25   |                  | no phenotype                                                     |           |
| 77        | 3D8       | T1           | CG7012    | nct         | nica strin agro            | pnr       | 25   |                  | not checked                                                      |           |
| 78        | 3D8       | T2           | CG7012    | nct         | nica strin agro            | pnr       | 25   |                  | not checked                                                      |           |
| 79        | 43H2      | T1           | CG5884    | par-6       | par-6                      | pnr       | 25   |                  | not checked                                                      | bad cross |
| 80        | 43H2      | T2           | CG5884    | par-6       | par-6                      | pnr       | 25   |                  | lethal                                                           |           |
| 81        | 47B8      | T3           | CG11988   | neur        | neurallized                | pnr       | 25   |                  | no phenotype                                                     |           |
| 82        | 47B8      | T4           | CG11988   | neur        | neurallized                | pnr       | 25   |                  | no phenotype                                                     |           |
| 83        | 47B8      |              | CG11988   | neur        | neurallized                | pnr       | 25   |                  | no phenotype                                                     |           |
| 86        | 49H2      | T1           | CG5888    | psn         | Presentin Dps CG18803      | pnr       | 25   |                  | strong loss of bristles                                          |           |
| 124       | 16B7      | T1           | CG5099    | msi         | msi                        | pnr       | 25   |                  | empty or multiple sockets, duplicated hairs                      |           |
| 125       | 17H1      | T2           | CG3497    | Su(H)       | Su(H)                      | pnr       | 25   |                  | no phenotype                                                     |           |
| 126       | 17H1      | T3           | CG3497    | Su(H)       | Su(H)                      | pnr       | 25   |                  | no phenotype                                                     |           |
| 141       | 15F3      | T2           | CG10261   | aPKC        | aPKC                       | pnr       | 25   |                  | notum death malformation                                         |           |
| 144       | 14B5      | T2           | CG5248    | loco        | CG17229                    | pnr       | 25   |                  | no phenotype                                                     |           |
| 146       | 130D8     | T1           | CG3258    | ase         | ase                        | pnr       | 25   |                  | no phenotype                                                     |           |
| 147       | 130D8     | T2           | CG3258    | ase         | ase                        | pnr       | 25   |                  | no phenotype                                                     |           |
| 148       | 130D8     | T3           | CG3258    | ase         | ase                        | pnr       | 25   |                  | no phenotype                                                     |           |
| 19        | 122G6     | T2           | CG5462    | scrib       | scribbled                  | pnr       | 18   |                  | rare loss of bristles                                            |           |
| 20        | 122G6     | T3           | CG5462    | scrib       | scribbled                  | pnr       | 18   |                  | no phenotype                                                     |           |
| 21        | 122G6     | T4           | CG5462    | scrib       | scribbled                  | pnr       | 18   |                  | lethal                                                           |           |
| 22        | 123A4     | T1           | CG5892    | raps        | rapsynoid                  | pnr       | 18   |                  | no phenotype                                                     |           |
| 23        | 123A7     |              | CG5771    | Rab11       | Rab-protein 11             | pnr       | 18   |                  | lethal                                                           |           |
| 32        | 129E3     |              | CG7867    | nuf         | nuclear fallout            | pnr       | 18   |                  | not checked                                                      |           |
| 33        | 129E3     |              | CG7867    | nuf         | nuclear fallout            | pnr       | 18   |                  | not checked                                                      |           |
| 34        | 12H12     | T3           | CG4482    | mol         | moladi etz nlp CG15268     | pnr       | 18   |                  | not checked                                                      |           |
| 45        | 122G6     | T1           | CG5462    | scrib       | scribbled                  | pnr       | 18   |                  | lethal, escapers with strong notum malformation                  |           |
| 52        | 14B5      | T2           | CG5248    | loco        | CG17229 locomotion defects | pnr       | 18   |                  | not checked                                                      |           |
| 53        | 14B5      | T3           | CG5248    | loco        | CG17229 locomotion defects | pnr       | 18   |                  | no phenotype                                                     |           |
| 54        | 14B5      | T4           | CG5248    | loco        | CG17229 locomotion defects | pnr       | 18   |                  | not checked                                                      |           |
| 58        | 15H5      | T2           | CG5055    | baz         | Par3                       | pnr       | 18   |                  | no phenotype                                                     |           |
| 59        | 15H5      | T1           | CG5055    | baz         | Par3                       | pnr       | 18   |                  | duplicated hairs                                                 |           |
| 60        |           |              |           | white minus |                            | pnr       | 18   |                  | no phenotype                                                     |           |
| 61        | 16C8      | T1           | CG3779    | numb        | nb                         | pnr       | 18   |                  | strong empty or multiple sockets                                 |           |
| 66        | 2B7       | T1           | CG3619    | Di          | Delta                      | pnr       | 18   |                  | strong gain of bristles, m only                                  |           |
| 67        | 2B7       | T1           | CG3619    | Di          | Delta                      | pnr       | 18   |                  | gain of bristles, m only                                         |           |
| 68        | 2B7       | T2           | CG3619    | Di          | Delta                      | pnr       | 18   |                  | gain of bristles, m only                                         |           |
| 69        | 2B7       | T2           | CG3619    | Di          | Delta                      | pnr       | 18   |                  | not checked                                                      | bad cross |
| 70        | 2H6       | T1           | CG3936    | N           | Notch split                | pnr       | 18   |                  | gain of bristles, m only, rare notum death malformation          |           |
| 71        | 2C7       |              | CG6127    | Ser         | Serrate Beaded Ripped wing | pnr       | 18   |                  | no phenotype                                                     |           |
| 72        | 2H6       | T1           | CG3936    | N           | Notch split                | pnr       | 18   |                  | lethal, escapers loss of bristles and notum death malformation   |           |
| 73        | 32B1      | T1           | CG1539    | spdo        | sanpodo CG1149 3CG15540    | pnr       | 18   |                  | not checked                                                      |           |
| 74        | 32B8      | T1           | CG1539    | spdo        | sanpodo CG1149 3CG15540    | pnr       | 18   |                  | no phenotype                                                     |           |
| 77        | 3D8       | T1           | CG7012    | nct         | nica strin agro            | pnr       | 18   |                  | not checked                                                      |           |
| 78        | 3D8       | T2           | CG7012    | nct         | nica strin agro            | pnr       | 18   |                  | not checked                                                      |           |
| 79        | 43H2      | T1           | CG5884    | par-6       | par-6                      | pnr       | 18   |                  | not checked                                                      | bad cross |
| 80        | 43H2      | T2           | CG5884    | par-6       | par-6                      | pnr       | 18   |                  | not checked                                                      | bad cross |
| 81        | 47B8      | T3           | CG11988   | neur        | neurallized                | pnr       | 18   |                  | no phenotype                                                     |           |
| 82        | 47B8      | T4           | CG11988   | neur        | neurallized                | pnr       | 18   |                  | no phenotype                                                     |           |
| 83        | 47B8      |              | CG11988   | neur        | neurallized                | pnr       | 18   |                  | not checked                                                      |           |
| 86        | 49H2      | T1           | CG5888    | psn         | Presentin Dps CG18803      | pnr       | 18   |                  | stronger loss of bristles, rare duplication of hairs             |           |
| 124       | 16B7      | T1           | CG5099    | msi         | msi                        | pnr       | 18   |                  | empty or multiple sockets                                        |           |
| 125       | 17H1      | T2           | CG3497    | Su(H)       | Su(H)                      | pnr       | 18   |                  | no phenotype                                                     |           |
| 126       | 17H1      | T3           | CG3497    | Su(H)       | Su(H)                      | pnr       | 18   |                  | not checked                                                      |           |
| 141       | 15F3      | T2           | CG10261   | aPKC        | aPKC                       | pnr       | 18   |                  | rare empty or multiple sockets, loss of bristles                 |           |
| 144       | 14B5      | T2           | CG5248    | loco        | CG17229                    | pnr       | 18   |                  | no phenotype                                                     |           |
| 146       | 130D8     | T1           | CG3258    | ase         | ase                        | pnr       | 18   |                  | not checked                                                      |           |
| 147       | 130D8     | T2           | CG3258    | ase         | ase                        | pnr       | 18   |                  | not checked                                                      |           |
| 148       | 130D8     | T3           | CG3258    | ase         | ase                        | pnr       | 18   |                  | not checked                                                      |           |
| 19        | 122G6     | T2           | CG5462    | scrib       | scribbled                  | sca       | 29   |                  | no phenotype                                                     |           |
| 20        | 122G6     | T3           | CG5462    | scrib       | scribbled                  | sca       | 29   |                  | no phenotype                                                     |           |
| 21        | 122G6     | T4           | CG5462    | scrib       | scribbled                  | sca       | 29   |                  | lethal                                                           |           |
| 22        | 123A4     | T1           | CG5892    | raps        | rapsynoid                  | sca       | 29   |                  | rare duplicated hair                                             |           |
| 23        | 123A7     |              | CG5771    | Rab11       | Rab-protein 11             | sca       | 29   |                  | lethal                                                           |           |
| 32        | 129E3     |              | CG7867    | nuf         | nuclear fallout            | sca       | 29   |                  | no phenotype                                                     |           |
| 33        | 129E3     |              | CG7867    | nuf         | nuclear fallout            | sca       | 29   |                  | not checked                                                      | bad cross |
| 34        | 12H12     | T3           | CG4482    | mol         | moladi etz nlp CG15268     | sca       | 29   |                  | no phenotype                                                     |           |
| 35        | 122G6     | T1           | CG5462    | scrib       | scribbled                  | sca       | 29   |                  | lethal                                                           |           |
| 52        | 14B5      | T2           | CG5248    | loco        | CG17229 locomotion defects | sca       | 29   |                  | no phenotype                                                     |           |
| 53        | 14B5      | T3           | CG5248    | loco        | CG17229 locomotion defects | sca       | 29   |                  | rare loss of M                                                   |           |
| 54        | 14B5      | T4           | CG5248    | loco        | CG17229 locomotion defects | sca       | 29   |                  | no phenotype                                                     |           |
| 58        | 15H5      | T2           | CG5055    | baz         | Par3                       | sca       | 29   |                  | gain and loss M on same fly                                      |           |

Supplementary Table 1.

| JM Number | Construct | Transformant | CG number | Gene Symbol | Gene Synonyms               | GAL4 line   | Temp | Phenotype Colour | Phenotype                                             | Comment   |
|-----------|-----------|--------------|-----------|-------------|-----------------------------|-------------|------|------------------|-------------------------------------------------------|-----------|
| 59        | 15H5      | T1           | CG5055    | baz         | white minus                 | Par3        | sca  | 29               | no phenotype                                          |           |
| 60        |           |              |           |             |                             |             | sca  | 29               | no phenotype                                          |           |
| 61        | 16C8      | T1           | CG3779    | numb        |                             | Delta       | sca  | 29               | empty or multiple sockets                             |           |
| 66        | 2B7       | T1           | CG3619    | DI          |                             | Delta       | sca  | 29               | weak gain of bristles, lethal                         |           |
| 67        | 2B7       | T1           | CG3619    | DI          |                             | Delta       | sca  | 29               | weak gain of bristles, lethal                         |           |
| 68        | 2B7       | T2           | CG3619    | DI          |                             | Delta       | sca  | 29               | lethal                                                |           |
| 69        | 2B7       | T2           | CG3619    | DI          |                             | Delta       | sca  | 29               | lethal                                                |           |
| 70        | 2H6       | T1           | CG3936    | N           |                             | Notch split | sca  | 29               | lethal, escapers no phenotype                         |           |
| 71        | 2C7       |              | CG6127    | Ser         | Serrate Beaded Rippled wing |             | sca  | 29               | lethal                                                |           |
| 72        | 2H6       | T1           | CG3936    | N           |                             | Notch split | sca  | 29               | lethal                                                |           |
| 73        | 32B1      | T1           | CG1539    | spdo        | sanpodo CG1149 3 CG15540    |             | sca  | 29               | lethal                                                |           |
| 74        | 32B8      | T1           | CG1539    | spdo        | sanpodo CG1149 3 CG15540    |             | sca  | 29               | no phenotype                                          |           |
| 77        | 3D8       | T1           | CG7012    | nct         | nicastrin agro              |             | sca  | 29               | no phenotype                                          |           |
| 78        | 3D8       | T2           | CG7012    | nct         | nicastrin agro              |             | sca  | 29               | no phenotype                                          |           |
| 79        | 43H2      | T1           | CG5884    | par-6       |                             |             | sca  | 29               | lethal                                                |           |
| 80        | 43H2      | T2           | CG5884    | par-6       |                             |             | sca  | 29               | lethal, escapers loss of all bristles                 |           |
| 81        | 47B8      | T3           | CG11988   | neur        | neuralized                  |             | sca  | 29               | no phenotype                                          |           |
| 82        | 47B8      | T4           | CG11988   | neur        | neuralized                  |             | sca  | 29               | no phenotype                                          |           |
| 83        | 47B8      |              | CG11988   | neur        | neuralized                  |             | sca  | 29               | no phenotype                                          |           |
| 86        | 49H2      | T1           | CG5868    | psn         | Presenilin Dps CG18803      |             | sca  | 29               | no phenotype                                          |           |
| 124       | 16B7      | T1           | CG5059    | msi         |                             |             | sca  | 29               | lethal, escapers duplication of M                     |           |
| 125       | 17H1      | T2           | CG3497    | Su(H)       |                             |             | sca  | 29               | no phenotype                                          |           |
| 126       | 17H1      | T3           | CG3497    | Su(H)       |                             |             | sca  | 29               | no phenotype                                          |           |
| 141       | 15F3      | T2           | CG10261   | aPKC        |                             |             | sca  | 29               | no phenotype                                          |           |
| 144       | 14B5      | T2           | CG5248    | loco        | CG17229                     |             | sca  | 29               | no phenotype                                          |           |
| 146       | 130D8     | T1           | CG3258    | ase         |                             |             | sca  | 29               | no phenotype                                          |           |
| 147       | 130D8     | T2           | CG3258    | ase         |                             |             | sca  | 29               | rare duplicated hair, loss of M                       |           |
| 148       | 130D8     | T3           | CG3258    | ase         |                             |             | sca  | 29               | no phenotype                                          |           |
| 19        | 122G6     | T2           | CG5462    | scrib       | scribbled                   |             | sca  | 25               | no phenotype                                          |           |
| 20        | 122G6     | T3           | CG5462    | scrib       | scribbled                   |             | sca  | 25               | no phenotype                                          |           |
| 21        | 122G6     | T4           | CG5462    | scrib       | scribbled                   |             | sca  | 25               | lethal                                                |           |
| 22        | 123A4     | T1           | CG5692    | raps        | rapsynoid                   |             | sca  | 25               | no phenotype                                          |           |
| 23        | 123A7     |              | CG5771    | Rab11       | Rab-protein 11              |             | sca  | 25               | lethal                                                |           |
| 32        | 129E3     |              | CG7867    | nuf         | nuclear fallout             |             | sca  | 25               | not checked                                           |           |
| 33        | 129E3     |              | CG7867    | nuf         | nuclear fallout             |             | sca  | 25               | not checked                                           |           |
| 34        | 12H12     | T3           | CG4482    | mol         | molad etz n/p CG15268       |             | sca  | 25               | not checked                                           |           |
| 35        | 122G6     | T1           | CG5462    | scrib       | scribbled                   |             | sca  | 25               | strong loss of bristles, M only                       |           |
| 52        | 14B5      | T2           | CG5248    | loco        | CG17229 locomotion defects  |             | sca  | 25               | no phenotype                                          |           |
| 53        | 14B5      | T3           | CG5248    | loco        | CG17229 locomotion defects  |             | sca  | 25               | no phenotype                                          |           |
| 54        | 14B5      | T4           | CG5248    | loco        | CG17229 locomotion defects  |             | sca  | 25               | no phenotype                                          |           |
| 58        | 15H5      | T2           | CG5055    | baz         | Par3                        |             | sca  | 25               | no phenotype                                          |           |
| 59        | 15H5      | T1           | CG5055    | baz         | Par3                        |             | sca  | 25               | adults die in food, rare duplicated hairs             |           |
| 60        |           |              |           | white minus |                             |             | sca  | 25               | no phenotype                                          |           |
| 61        | 16C8      | T1           | CG3779    | numb        | nb                          |             | sca  | 25               | empty or multiple sockets, M only, head and notum     |           |
| 66        | 2B7       | T1           | CG3619    | DI          | Delta                       |             | sca  | 25               | lethal, pharate adults with gain of bristles          |           |
| 67        | 2B7       | T1           | CG3619    | DI          | Delta                       |             | sca  | 25               | adults die in food, escapers have no phenotype        |           |
| 68        | 2B7       | T2           | CG3619    | DI          | Delta                       |             | sca  | 25               | no phenotype                                          |           |
| 69        | 2B7       | T2           | CG3619    | DI          | Delta                       |             | sca  | 25               | no phenotype                                          |           |
| 70        | 2H6       | T1           | CG3936    | N           |                             | Notch split | sca  | 25               | lethal, escapers mild gain of bristles                |           |
| 71        | 2C7       |              | CG6127    | Ser         | Serrate Beaded Rippled wing |             | sca  | 25               | no phenotype                                          |           |
| 72        | 2H6       | T1           | CG3936    | N           |                             | Notch split | sca  | 25               | lethal                                                |           |
| 73        | 32B1      | T1           | CG1539    | spdo        | sanpodo CG1149 3 CG15540    |             | sca  | 25               | no phenotype                                          |           |
| 74        | 32B8      | T1           | CG1539    | spdo        | sanpodo CG1149 3 CG15540    |             | sca  | 25               | no phenotype                                          |           |
| 77        | 3D8       | T1           | CG7012    | nct         | nicastrin agro              |             | sca  | 25               | not checked                                           |           |
| 78        | 3D8       | T2           | CG7012    | nct         | nicastrin agro              |             | sca  | 25               | not checked                                           |           |
| 79        | 43H2      | T1           | CG5884    | par-6       |                             |             | sca  | 25               | loss of bristles, head and notum, M only              |           |
| 80        | 43H2      | T2           | CG5884    | par-6       |                             |             | sca  | 25               | not checked                                           | bad cross |
| 81        | 47B8      | T3           | CG11988   | neur        | neuralized                  |             | sca  | 25               | no phenotype                                          |           |
| 82        | 47B8      | T4           | CG11988   | neur        | neuralized                  |             | sca  | 25               | no phenotype                                          |           |
| 83        | 47B8      |              | CG11988   | neur        | neuralized                  |             | sca  | 25               | no phenotype                                          |           |
| 86        | 49H2      | T1           | CG5868    | psn         | Presenilin Dps CG18803      |             | sca  | 25               | no phenotype                                          |           |
| 124       | 16B7      | T1           | CG5059    | msi         |                             |             | sca  | 25               | lethal                                                |           |
| 125       | 17H1      | T2           | CG3497    | Su(H)       |                             |             | sca  | 25               | no phenotype                                          |           |
| 126       | 17H1      | T3           | CG3497    | Su(H)       |                             |             | sca  | 25               | no phenotype                                          |           |
| 141       | 15F3      | T2           | CG10261   | aPKC        |                             |             | sca  | 25               | no phenotype                                          |           |
| 144       | 14B5      | T2           | CG5248    | loco        | CG17229                     |             | sca  | 25               | no phenotype                                          |           |
| 146       | 130D8     | T1           | CG3258    | ase         |                             |             | sca  | 25               | no phenotype                                          |           |
| 147       | 130D8     | T2           | CG3258    | ase         |                             |             | sca  | 25               | no phenotype                                          |           |
| 148       | 130D8     | T3           | CG3258    | ase         |                             |             | sca  | 25               | no phenotype                                          |           |
| 19        | 122G6     | T2           | CG5462    | scrib       | scribbled                   |             | sca  | 18               | no phenotype                                          |           |
| 20        | 122G6     | T3           | CG5462    | scrib       | scribbled                   |             | sca  | 18               | no phenotype                                          |           |
| 21        | 122G6     | T4           | CG5462    | scrib       | scribbled                   |             | sca  | 18               | no phenotype                                          |           |
| 22        | 123A4     | T1           | CG5692    | raps        | rapsynoid                   |             | sca  | 18               | no phenotype                                          |           |
| 23        | 123A7     |              | CG5771    | Rab11       | Rab-protein 11              |             | sca  | 18               | lethal, escapers with strong loss of bristles, M only |           |
| 32        | 129E3     |              | CG7867    | nuf         | nuclear fallout             |             | sca  | 18               | not checked                                           |           |
| 33        | 129E3     |              | CG7867    | nuf         | nuclear fallout             |             | sca  | 18               | not checked                                           |           |
| 34        | 12H12     | T3           | CG4482    | mol         | molad etz n/p CG15268       |             | sca  | 18               | not checked                                           |           |
| 35        | 122G6     | T1           | CG5462    | scrib       | scribbled                   |             | sca  | 18               | no phenotype                                          |           |
| 52        | 14B5      | T2           | CG5248    | loco        | CG17229 locomotion defects  |             | sca  | 18               | not checked                                           |           |
| 53        | 14B5      | T3           | CG5248    | loco        | CG17229 locomotion defects  |             | sca  | 18               | no phenotype                                          |           |
| 54        | 14B5      | T4           | CG5248    | loco        | CG17229 locomotion defects  |             | sca  | 18               | not checked                                           |           |
| 58        | 15H5      | T2           | CG5055    | baz         | Par3                        |             | sca  | 18               | no phenotype                                          |           |
| 59        | 15H5      | T1           | CG5055    | baz         | Par3                        |             | sca  | 18               | no phenotype                                          |           |
| 60        |           |              |           | white minus |                             |             | sca  | 18               | no phenotype                                          |           |
| 61        | 16C8      | T1           | CG3779    | numb        | nb                          |             | sca  | 18               | rare empty or multiple sockets                        |           |
| 66        | 2B7       | T1           | CG3619    | DI          | Delta                       |             | sca  | 18               | no phenotype                                          |           |
| 67        | 2B7       | T1           | CG3619    | DI          | Delta                       |             | sca  | 18               | no phenotype                                          |           |
| 68        | 2B7       | T2           | CG3619    | DI          | Delta                       |             | sca  | 18               | no phenotype                                          |           |
| 69        | 2B7       | T2           | CG3619    | DI          | Delta                       |             | sca  | 18               | no phenotype                                          |           |
| 70        | 2H6       | T1           | CG3936    | N           |                             | Notch split | sca  | 18               | no phenotype                                          |           |
| 71        | 2C7       |              | CG6127    | Ser         | Serrate Beaded Rippled wing |             | sca  | 18               | no phenotype                                          |           |
| 72        | 2H6       | T1           | CG3936    | N           |                             | Notch split | sca  | 18               | lethal                                                |           |
| 73        | 32B1      | T1           | CG1539    | spdo        | sanpodo CG1149 3 CG15540    |             | sca  | 18               | not checked                                           |           |
| 74        | 32B8      | T1           | CG1539    | spdo        | sanpodo CG1149 3 CG15540    |             | sca  | 18               | no phenotype                                          |           |
| 77        | 3D8       | T1           | CG7012    | nct         | nicastrin agro              |             | sca  | 18               | not checked                                           |           |
| 78        | 3D8       | T2           | CG7012    | nct         | nicastrin agro              |             | sca  | 18               | not checked                                           |           |
| 79        | 43H2      | T1           | CG5884    | par-6       |                             |             | sca  | 18               | rare loss of M                                        |           |
| 80        | 43H2      | T2           | CG5884    | par-6       |                             |             | sca  | 18               | not checked                                           | bad cross |
| 81        | 47B8      | T3           | CG11988   | neur        | neuralized                  |             | sca  | 18               | no phenotype                                          |           |
| 82        | 47B8      | T4           | CG11988   | neur        | neuralized                  |             | sca  | 18               | no phenotype                                          |           |
| 83        | 47B8      |              | CG11988   | neur        | neuralized                  |             | sca  | 18               | not checked                                           |           |
| 86        | 49H2      | T1           | CG5868    | psn         | Presenilin Dps CG18803      |             | sca  | 18               | no phenotype                                          |           |
| 124       | 16B7      | T1           | CG5059    | msi         |                             |             | sca  | 18               | rare loss of M, rare duplication of hairs             |           |
| 125       | 17H1      | T2           | CG3497    | Su(H)       |                             |             | sca  | 18               | no phenotype                                          |           |
| 126       | 17H1      | T3           | CG3497    | Su(H)       |                             |             | sca  | 18               | not checked                                           |           |
| 141       | 15F3      | T2           | CG10261   | aPKC        |                             |             | sca  | 18               | no phenotype                                          |           |
| 144       | 14B5      | T2           | CG5248    | loco        | CG17229                     |             | sca  | 18               | no phenotype                                          |           |
| 146       | 130D8     | T1           | CG3258    | ase         |                             |             | sca  | 18               | not checked                                           |           |
| 147       | 130D8     | T2           | CG3258    | ase         |                             |             | sca  | 18               | not checked                                           |           |
| 148       | 130D8     | T3           | CG3258    | ase         |                             |             | sca  | 18               | not checked                                           |           |

**Colour Key**  
 medium to strong phenotypes  
 rare, weak phenotypes  
 no phenotype  
 lethal (even if escapers are present)  
 no colour not checked

To identify a suitable GAL4 driver line for the genome-wide screen we tested *fzIII*-GAL4, *sca*-GAL4 and *pnr*-GAL4 at 18, 25 and 29 °C. Table shows the gene targeted by RNAi, temperature, driver and resulting phenotype. (pdf; 116 kb)

**Supplementary Table 3. GO Term over-representation among genes with similar phenotypes**

| <i>GO Term</i>                                                                  | <i>Number</i> | <i>P value</i> |
|---------------------------------------------------------------------------------|---------------|----------------|
| <b>Growth and Proliferation Phenotypes (<math>P_{Overprolif} &gt; 0</math>)</b> |               |                |
| imaginal disc development                                                       | GO:0007444    | 2.34E-11       |
| regulation of organ growth                                                      | GO:0046620    | 8.95E-08       |
| cell proliferation                                                              | GO:0008283    | 4.33E-05       |
| regulation of growth                                                            | GO:0040008    | 1.67E-04       |
| <b>Bristle Polarity Defects (<math>P_{Polarity} \geq 4</math>)</b>              |               |                |
| establishment of planar polarity                                                | GO:0001736    | 4.62E-19       |
| establishment of imaginal disc-derived wing hair orientation                    | GO:0001737    | 2.87E-11       |
| <b>Bristle Morphology Defects (<math>P_{BMorph} &gt; 0</math>)</b>              |               |                |
| mitochondrion                                                                   | GO:0005739    | 8.75E-79       |
| ribosome                                                                        | GO:0005840    | 2.08E-39       |
| primary metabolic process                                                       | GO:0044238    | 1.21E-13       |
| cytoskeleton                                                                    | GO:0005856    | 9.04E-05       |
| translation                                                                     | GO:0006412    | 9.16E-04       |
| <b>Asymmetric Cell Division</b>                                                 |               |                |
| nervous system development                                                      | GO:0007399    | 8.22E-12       |
| asymmetric cell division                                                        | GO:0008356    | 5.23E-06       |
| regulation of cell cycle                                                        | GO:0051726    | 1.28E-05       |
| Notch signaling pathway                                                         | GO:0007219    | 2.96E-05       |
| lateral inhibition                                                              | GO:0046331    | 7.80E-04       |
| sensory organ precursor cell fate determination                                 | GO:0016360    | 1.37E-03       |
| spindle localization                                                            | GO:0051653    | 7.66E-03       |
| <b>Lateral Inhibition</b>                                                       |               |                |
| neurogenesis                                                                    | GO:0022008    | 7.67E-10       |
| Notch signaling pathway                                                         | GO:0007219    | 4.62E-05       |
| cell fate commitment                                                            | GO:0045165    | 7.03E-05       |
| lateral inhibition                                                              | GO:0046331    | 1.10E-03       |
| imaginal disc-derived wing vein specification                                   | GO:0007474    | 6.64E-03       |

Selected GO Terms and corresponding P-values for statistical over-representation compared to random gene sets of comparable sizes are shown for groups of genes that cause growth and proliferation, polarity, bristle morphology, asymmetric cell division and lateral inhibition phenotypes in the genome-wide screen. (**doc; 79 kb**)

## Supplementary Table 4. False negative result data

| Transformant ID | CG Number | 5.7 Expected phenotype? (line) | Expected phenotype? (gene) |
|-----------------|-----------|--------------------------------|----------------------------|
| 11257           | CG1007    | yes                            | yes                        |
| 15620           | CG10542   | notum malformation death       | notum malformation death   |
| 35507           | CG11798   | no                             | no                         |
| 35508           | CG11798   | no                             |                            |
| 10662           | CG11988   | yes                            | yes                        |
| 44046           | CG12366   | yes                            | yes                        |
| 27044           | CG12676   | lethal                         | yes                        |
| 3087            | CG12676   | yes                            |                            |
| 938             | CG12676   | yes                            |                            |
| 937             | CG12676   | yes                            |                            |
| 12647           | CG13281   | lethal                         | lethal                     |
| 12648           | CG13281   | lethal                         |                            |
| 13759           | CG1520    | yes                            | yes                        |
| 13757           | CG1520    | yes                            |                            |
| 41134           | CG1725    | lethal                         | lethal                     |
| 44527           | CG17579   | yes                            | yes                        |
| 44528           | CG17579   | yes                            |                            |
| 43075           | CG17697   | yes (polarity)                 | yes                        |
| 43077           | CG17697   | yes (polarity)                 |                            |
| 10855           | CG1856    | yes                            | yes                        |
| 43083           | CG18803   | yes                            | yes                        |
| 43082           | CG18803   | yes                            |                            |
| 28341           | CG1903    | lethal                         | lethal                     |
| 19124           | CG2204    | no                             | no                         |
| 7769            | CG2534    | no                             | no                         |
| 7005            | CG2621    | no                             | no                         |
| 16820           | CG2855    | yes                            | yes                        |
| 16821           | CG2855    | yes                            |                            |
| 6858            | CG31020   | yes                            | yes                        |
| 6856            | CG31020   | no                             |                            |
| 14480           | CG31152   | no                             | no                         |
| 14481           | CG31152   | no                             |                            |
| 11690           | CG32120   | lethal                         | lethal                     |
| 9925            | CG3497    | no                             | no                         |
| 27187           | CG3619    | yes                            | yes                        |
| 3720            | CG3619    | yes                            |                            |
| 37288           | CG3619    | yes                            |                            |
| 37287           | CG3619    | yes                            |                            |
|                 | CG3779    | yes                            | yes                        |
| 7758            | CG3796    | no                             | no                         |
| 7756            | CG3796    | no                             |                            |
| 7759            | CG3796    | no                             |                            |
| 5302            | CG3874    | no                             | no                         |
| 21469           | CG3874    | no                             |                            |
| 21468           | CG3874    | no                             |                            |
| 47542           | CG3874    | no                             |                            |
| 47543           | CG3874    | no                             |                            |
| 7796            | CG3929    | no                             | no                         |
| 7795            | CG3929    | no                             |                            |
| 1112            | CG3936    | yes                            | yes                        |
| 27229           | CG3936    | yes                            |                            |
| 27228           | CG3936    | yes                            |                            |
| 15565           | CG4260    | lethal                         | lethal                     |
| 15566           | CG4260    | lethal                         |                            |
| 21928           | CG4713    | lethal                         | lethal                     |
| 8892            | CG4722    | no                             | yes                        |
| 8893            | CG4722    | yes                            |                            |
| 2914            | CG5055    | yes                            | yes                        |
| 2915            | CG5055    | yes                            |                            |
| 11784           | CG5099    | yes                            | yes                        |
| 44895           | CG5099    | yes                            |                            |
| 41839           | CG5363    | notum malformation death       | notum malformation death   |
| 41838           | CG5363    | notum malformation death       |                            |
| 24466           | CG5460    | yes                            | yes                        |
| 33294           | CG5820    | lethal                         | yes                        |
| 900             | CG5820    | lethal                         |                            |
| 899             | CG5820    | lethal                         |                            |
| 36301           | CG5820    | yes                            |                            |
| 33295           | CG5820    | no                             |                            |
| 27525           | CG5841    | yes                            | yes                        |
| 27526           | CG5841    | yes                            |                            |
| 34340           | CG6235    | yes                            | yes                        |
| 34339           | CG6235    | yes                            |                            |
| 35132           | CG6897    | yes                            | yes                        |
| 35134           | CG6897    | yes                            |                            |
| 7376            | CG8075    | yes                            | yes                        |
| 48690           | CG8118    | no                             | no                         |
| 6315            | CG8384    | yes                            | yes                        |
| 6316            | CG8384    | yes                            |                            |

Table indicates whether phenotypes in the genome-wide screen agree with published phenotypes for set of 42 genes previously described as members of the Notch signaling pathway or the asymmetric cell fate specification machinery. (pdf; 32 kb)

**Supplementary Table 5. Second UAS-hairpin transgenic line results**

| CG number 5.7 | Source  | RNAi line ID | overlap 1st construct | Same pheno. multi 1st lines? | Result (line) | Result (gene) |
|---------------|---------|--------------|-----------------------|------------------------------|---------------|---------------|
| CG10210       | NIG-FLY | 10210R-1     |                       | 0% no                        | similar       | same          |
| CG10210       | NIG-FLY | 10210R-2     |                       | 0% no                        | same          |               |
| CG10261       | custom  | 1B1 T1       |                       | 0% 1 line                    | lethal (p)    | same (p)      |
| CG10261       | custom  | 1B1 T2       |                       | 0% 1 line                    | lethal (p)    |               |
| CG10618       | NIG-FLY | 10618R-1     |                       | 53% 1 line                   | no pheno.     | no pheno.     |
| CG10618       | NIG-FLY | 10618R-2     |                       | 53% 1 line                   | no pheno.     |               |
| CG10776       | NIG-FLY | 10776R-1     |                       | 0% no                        | no pheno.     | no pheno.     |
| CG10776       | NIG-FLY | 10776R-2     |                       | 0% no                        | no pheno.     |               |
| CG10954       | NIG-FLY | 10954R-1     |                       | 40% 1 line                   | same          | same          |
| CG10954       | NIG-FLY | 10954R-4     |                       | 40% 1 line                   | same          |               |
| CG11101       | NIG-FLY | 11101R-2     |                       | 0% no                        | similar (p)   | similar (p)   |
| CG11101       | NIG-FLY | 11101R-3     |                       | 0% no                        | similar (p)   |               |
| CG11940       | NIG-FLY | 11940R-2     |                       | 0% no                        | lethal        | similar       |
| CG11940       | NIG-FLY | 11940R-3     |                       | 0% no                        | similar       |               |
| CG11988       | custom  | 1A3-5 T1     |                       | 0% 1 line                    | same (p)      | same (p)      |
| CG12352       | NIG-FLY | 12352R-1     |                       | 57% yes                      | same          | same          |
| CG12352       | NIG-FLY | 12352R-3     |                       | 57% yes                      | same          |               |
| CG12366       | custom  | 1G3 1 T1     |                       | 0% 1 line                    | same (p)      | same (p)      |
| CG12366       | custom  | 1G3 1 T2     |                       | 0% 1 line                    | same (p)      |               |
| CG12484       | NIG-FLY | 12484R-1     |                       | 0% yes                       | no pheno.     | no pheno.     |
| CG12484       | NIG-FLY | 12484R-2     |                       | 0% yes                       | no pheno.     |               |
| CG12818       | NIG-FLY | 12818R-1     |                       | 59% no                       | no pheno.     | no pheno.     |
| CG12818       | NIG-FLY | 12818R-3     |                       | 59% no                       | no pheno.     |               |
| CG12880       | NIG-FLY | 12880R-1     |                       | 0% no                        | no pheno.     | no pheno.     |
| CG13208       | NIG-FLY | 13208R-2     |                       | 0% yes                       | same          | same          |
| CG13208       | NIG-FLY | 13208R-3     |                       | 0% yes                       | same          |               |
| CG13472       | NIG-FLY | 13472R-1     |                       | 0% no                        | no pheno.     | no pheno.     |
| CG13472       | NIG-FLY | 13472R-3     |                       | 0% no                        | no pheno.     |               |
| CG13983       | custom  | 1D4 b) T1    |                       | 44% no                       | no pheno.     | no pheno.     |
| CG14721       | NIG-FLY | 14721R-2     |                       | 5% 1 line                    | no pheno.     | similar       |
| CG14721       | NIG-FLY | 14721R-2     |                       | 5% 1 line                    | similar       |               |
| CG15543       | NIG-FLY | 15443R-1     |                       | 63% 1 line                   | no pheno.     | no pheno.     |
| CG15543       | NIG-FLY | 15443R-2     |                       | 63% 1 line                   | no pheno.     |               |
| CG15769       | NIG-FLY | 15769R-2     |                       | 0% no                        | no pheno.     | no pheno.     |
| CG15769       | NIG-FLY | 15769R-4     |                       | 0% no                        | no pheno.     |               |
| CG16908       | NIG-FLY | 16908R-4     |                       | 0% yes                       | similar       | similar       |
| CG16993       | NIG-FLY | 16993R-1     |                       | 0% no                        | same (p)      | same (p)      |
| CG16993       | NIG-FLY | 16993R-2     |                       | 0% no                        | same (p)      |               |
| CG17559       | NIG-FLY | 17559R-2     |                       | 36% no                       | no pheno.     | no pheno.     |
| CG17559       | NIG-FLY | 17559R-3     |                       | 36% no                       | no pheno.     |               |
| CG17579       | NIG-FLY | 17579R-1     |                       | 0% yes                       | similar (p)   | similar (p)   |
| CG17657       | NIG-FLY | 17657R-1     |                       | 0% 1 line                    | same (p)      | same (p)      |
| CG17657       | NIG-FLY | 17657R-3     |                       | 0% 1 line                    | same (p)      |               |
| CG17928       | NIG-FLY | 17928R-1     |                       | 0% 1 line                    | no pheno.     | no pheno.     |
| CG17928       | NIG-FLY | 17928R-2     |                       | 0% 1 line                    | no pheno.     |               |
| CG1804        | NIG-FLY | 1804R-1      |                       | 0% no                        | different     | different     |
| CG1804        | NIG-FLY | 1804R-3      |                       | 0% no                        | different     |               |
| CG18214       | NIG-FLY | 18214R-1     |                       | 0% no                        | different     | different     |
| CG18214       | NIG-FLY | 18214R-2     |                       | 0% no                        | different     |               |
| CG1903        | NIG-FLY | 1903R-2      |                       | 0% 1 line                    | same (p)      | same (p)      |
| CG2179        | NIG-FLY | 2179R-2      |                       | 0% 1 line                    | similar       | similar       |
| CG2183        | NIG-FLY | 2183R-1      |                       | 59% no                       | no pheno.     | no pheno.     |
| CG31904       | NIG-FLY | 31904R-2     |                       | 0% 1 line                    | same          | same          |
| CG31904       | NIG-FLY | 31904R-3     |                       | 0% 1 line                    | same          |               |
| CG32707       | NIG-FLY | 4350R-2      |                       | 0% yes                       | same          | same          |
| CG32707       | NIG-FLY | 4350R-1      |                       | 0% yes                       | same          |               |
| CG32732       | NIG-FLY | 12542R-3     |                       | 0% 1 line                    | similar       | similar       |
| CG3298        | NIG-FLY | 3298R-1      |                       | 0% yes                       | same          | same          |
| CG3298        | NIG-FLY | 3298R-2      |                       | 0% yes                       | same          |               |
| CG33193       | NIG-FLY | 13831R-1     |                       | 0% no                        | no pheno.     | no pheno.     |
| CG33193       | NIG-FLY | 13831R-2     |                       | 0% no                        | no pheno.     |               |
| CG33196       | NIG-FLY | 15637R-1     |                       | 0% yes                       | no pheno.     | same          |
| CG33196       | NIG-FLY | 15637R-2     |                       | 0% yes                       | similar       |               |
| CG33196       | NIG-FLY | 31724R-2     |                       | 0% yes                       | same          |               |
| CG33196       | NIG-FLY | 31725R-1     |                       | 0% yes                       | same          |               |
| CG33196       | NIG-FLY | 31725R-3     |                       | 0% yes                       | same          |               |
| CG33196       | NIG-FLY | 31727R-1     |                       | 0% yes                       | same          |               |
| CG33196       | NIG-FLY | 31727R-3     |                       | 0% yes                       | same          |               |
| CG33205       | NIG-FLY | 32049R-1     |                       | 0% yes                       | same          | same          |
| CG33205       | NIG-FLY | 32049R-2     |                       | 0% yes                       | same          |               |



Supplementary Table 5.

| CG number | Source  | RNAi line ID | overlap 1st construct | Same pheno. multi 1st lines? | Result (line) | Result (gene) |
|-----------|---------|--------------|-----------------------|------------------------------|---------------|---------------|
| CG33484   | NIG-FLY | 32311R-1     |                       | 0% no                        | similar       | similar       |
| CG33484   | NIG-FLY | 32311R-2     |                       | 0% no                        | similar       |               |
| CG33554   | NIG-FLY | 2905R-3      |                       | 0% no                        | no pheno.     | same          |
| CG33554   | NIG-FLY | 2905R-7      |                       | 0% no                        | same          |               |
| CG33956   | NIG-FLY | 15507R-2     |                       | 0% yes                       | same          | same          |
| CG33956   | NIG-FLY | 15507R-4     |                       | 0% yes                       | same          |               |
| CG34409   | custom  | 1E8 3 T1     |                       | 0% no                        | no pheno.     | no pheno.     |
| CG34409   | custom  | 1E8 5 T1     |                       | 0% no                        | no pheno.     |               |
| CG34409   | custom  | 1E8 5 T2     |                       | 0% no                        | no pheno.     |               |
| CG3619    | custom  | 1A10 T1      |                       | 0% yes                       | same (p)      | same (p)      |
| CG3619    | custom  | 1A10 T2      |                       | 0% yes                       | same (p)      |               |
| CG3690    | NIG-FLY | 3690R-1      |                       | 0% no                        | no pheno.     | no pheno.     |
| CG3722    | NIG-FLY | 3722R-1      |                       | 0% yes                       | same (p)      | same (p)      |
| CG3722    | NIG-FLY | 3722R-2      |                       | 0% yes                       | same (p)      |               |
| CG3779    | NIG-FLY | 3779R-1      |                       | 66% 1 line                   | same (p)      | same (p)      |
| CG3779    | NIG-FLY | 3779R-3      |                       | 66% 1 line                   | same (p)      |               |
| CG3891    | NIG-FLY | 3891R-1      |                       | 67% yes                      | same          | same          |
| CG3891    | NIG-FLY | 3891R-2      |                       | 67% yes                      | same          |               |
| CG3936    | NIG-FLY | 3936R-2      |                       | 0% yes                       | same (p)      | same (p)      |
| CG3936    | NIG-FLY | 3936R-3      |                       | 0% yes                       | same (p)      |               |
| CG4311    | NIG-FLY | 4311R-1      |                       | 49% yes                      | same          | same          |
| CG4311    | NIG-FLY | 4311R-3      |                       | 49% yes                      | same          |               |
| CG4633    | NIG-FLY | 4633R-2      |                       | 0% yes                       | different     | different     |
| CG4633    | NIG-FLY | 4633R-4      |                       | 0% yes                       | different     |               |
| CG5055    | NIG-FLY | 5055R-2      |                       | 0% yes                       | same (p)      | same (p)      |
| CG5055    | NIG-FLY | 5055R-1      |                       | 0% yes                       | same (p)      |               |
| CG5070    | custom  | 1G11 T1      |                       | 28% no                       | different     | different     |
| CG5070    | custom  | 1G11 T2      |                       | 28% no                       | different     |               |
| CG5165    | NIG-FLY | 5165R-2      |                       | 0% no                        | no pheno.     | no pheno.     |
| CG5441    | custom  | 1C12 a) T1   |                       | 0% yes                       | same          | same          |
| CG5460    | custom  | 1D12 T1      |                       | 0% 1 line                    | similar (p)   | similar (p)   |
| CG5460    | custom  | 1D12 T2      |                       | 0% 1 line                    | no pheno. (p) |               |
| CG5608    | NIG-FLY | 5608R-1      |                       | 19% 1 line                   | no pheno.     | no pheno.     |
| CG5608    | NIG-FLY | 5608R-3      |                       | 19% 1 line                   | no pheno.     |               |
| CG5640    | NIG-FLY | 5640R-3      |                       | 0% yes                       | same          | same          |
| CG5640    | NIG-FLY | 5640R-2      |                       | 0% yes                       | similar       |               |
| CG5680    | NIG-FLY | 5680R-1      |                       | 62% yes                      | same (p)      | same (p)      |
| CG5680    | NIG-FLY | 5680R-2      |                       | 62% yes                      | same (p)      |               |
| CG5857    | custom  | 2B1 T2       |                       | 0% yes                       | no pheno.     | no pheno.     |
| CG6098    | NIG-FLY | 6098R-1      |                       | 0% yes                       | same          | same          |
| CG6098    | NIG-FLY | 6098R-2      |                       | 0% yes                       | same          |               |
| CG6202    | custom  | 2G1 T1       |                       | 25% no                       | same          | same          |
| CG6202    | custom  | 2G1 T2       |                       | 25% no                       | same          |               |
| CG6255    | NIG-FLY | 6255R-3      |                       | 0% no                        | no pheno.     | no pheno.     |
| CG6627    | NIG-FLY | 6627R-4      |                       | 0% no                        | no pheno.     | no pheno.     |
| CG6883    | NIG-FLY | 6883R-1      |                       | 0% yes                       | same          | same          |
| CG6883    | NIG-FLY | 6883R-2      |                       | 0% yes                       | same          |               |
| CG7454    | NIG-FLY | 7454R-1      |                       | 50% no                       | no pheno.     | no pheno.     |
| CG7454    | NIG-FLY | 7454R-3      |                       | 50% no                       | no pheno.     |               |
| CG7614    | NIG-FLY | 7614R-1      |                       | 0% 1 line                    | similar       | similar       |
| CG7614    | NIG-FLY | 7614R-3      |                       | 0% 1 line                    | similar       |               |
| CG7999    | NIG-FLY | 7999R-1      |                       | 0% 1 line                    | same          | same          |
| CG7999    | NIG-FLY | 7999R-2      |                       | 0% 1 line                    | same          |               |
| CG8142    | NIG-FLY | 8142R-2      |                       | 70% 1 line                   | same          | same          |
| CG8142    | NIG-FLY | 8142R-3      |                       | 70% 1 line                   | same          |               |
| CG8657    | NIG-FLY | 8657R-1      |                       | 0% 1 line                    | no pheno.     | no pheno.     |
| CG8657    | NIG-FLY | 8657R-2      |                       | 0% 1 line                    | no pheno.     |               |
| CG8865    | NIG-FLY | 8865R-1      |                       | 0% 1 line                    | different     | different     |
| CG8865    | NIG-FLY | 8865R-2      |                       | 0% 1 line                    | different     |               |
| CG8890    | NIG-FLY | 8890R-2      |                       | 0% 1 line                    | same (p)      | same (p)      |
| CG9249    | NIG-FLY | 9249R-1      |                       | 0% yes?                      | similar       | similar       |
| CG9249    | NIG-FLY | 9249R-3      |                       | 0% yes?                      | similar       |               |
| CG9596    | NIG-FLY | 9596R-1      |                       | 0% no                        | same          | same          |
| CG9596    | NIG-FLY | 9596R-2      |                       | 0% no                        | same          |               |
| CG9901    | NIG-FLY | 9901R-2      |                       | 0% yes                       | similar       | same          |
| CG9901    | NIG-FLY | 9901R-1      |                       | 0% yes                       | same          |               |

Note: (p) denotes positive control genes in the Notch pathway or asymmetric cell division

Table indicates whether phenotypes with an independently generated transgenic RNAi line agree with phenotypes obtained in the genome-wide screen for a set of 73 genes. The sequence overlap with the original library transgenic line is shown. (pdf; 54 kb)

**Supplementary Table 6. False positive result data**

| Transformant ID | CG Number 5.7 | Gene Symbol   | Expected phenotype?                                  |
|-----------------|---------------|---------------|------------------------------------------------------|
| 9240            | CG10385       | msl-1         | yes                                                  |
| 9239            | CG10385       | msl-1         | yes                                                  |
| 13562           | CG10612       | Or83a         | yes                                                  |
| 13563           | CG10612       | Or83a         | yes                                                  |
| 4225            | CG10888       | Rh3           | yes                                                  |
| 31390           | CG10986       | g             | yes                                                  |
| 31391           | CG10986       | g             | yes                                                  |
| 39766           | CG10986       | g             | yes                                                  |
| 41369           | CG10986       | g             | yes                                                  |
| 41368           | CG10986       | g             | yes                                                  |
| 19691           | CG11680       | mle           | yes                                                  |
| 9354            | CG13206       | Or47b         | yes                                                  |
| 26805           | CG14360       | Or88a         | yes                                                  |
| 11321           | CG1555        | cn            | yes                                                  |
| 11322           | CG1555        | cn            | yes                                                  |
| 13730           | CG15779       | Tre           | yes                                                  |
| 12347           | CG15779       | Tre           | yes                                                  |
| 2560            | CG16724       | tra           | yes                                                  |
| 2561            | CG16724       | tra           | yes                                                  |
| 7210            | CG16740       | Rh2           | yes                                                  |
| 7723            | CG16910       | key           | yes                                                  |
| 28225           | CG1980        | dj            | yes                                                  |
| 28224           | CG1980        | dj            | yes                                                  |
| 13673           | CG2075        | aly           | yes                                                  |
| 25591           | CG30170       | bgcn          | yes                                                  |
| 25590           | CG30170       | bgcn          | yes                                                  |
| 25015           | CG3029        | or            | yes                                                  |
| 25014           | CG3029        | or            | Expected? (notum malformation and overproliferation) |
| 3875            | CG31783       | ninaD         | yes                                                  |
| 29356           | CG3241        | msl-2         | yes                                                  |
| 14535           | CG32498       | dnc           | Expected? (notum malformation death)                 |
| 26299           | CG32498       | dnc           | yes                                                  |
| 24616           | CG32498       | dnc           | yes                                                  |
| 24615           | CG32498       | dnc           | yes                                                  |
| 16717           | CG32498       | dnc           | yes                                                  |
| 14534           | CG32498       | dnc           | Expected? (notum malformation death)                 |
| 15444           | CG32498       | dnc           | yes                                                  |
| 18140           | CG32498       | dnc           | Expected? (notum malformation death)                 |
| 45688           | CG3331        | e             | yes                                                  |
| 45689           | CG3331        | e             | yes                                                  |
| 26211           | CG3504        | inaD          | yes                                                  |
| 34286           | CG3525        | eas           | yes                                                  |
| 34287           | CG3525        | eas           | yes                                                  |
| 21490           | CG3620        | norpA         | yes                                                  |
| 10374           | CG4215        | spel1         | yes                                                  |
| 40876           | CG4314        | st            | yes                                                  |
| 40875           | CG4314        | st            | yes                                                  |
| 12045           | CG4319        | rpr           | yes                                                  |
| 27359           | CG5125        | ninaC         | yes                                                  |
| 27360           | CG5125        | ninaC         | yes                                                  |
| 1836            | CG5192        | Rh6           | yes                                                  |
| 23201           | CG5216        | Sir2          | yes                                                  |
| 23199           | CG5216        | Sir2          | yes                                                  |
| 19834           | CG5529        | B-H1          | yes                                                  |
| 9253            | CG5576        | imd           | yes                                                  |
| 1748            | CG5638        | Rh7           | yes                                                  |
| 8933            | CG6203        | Fmr1          | yes                                                  |
| 13380           | CG7303        | Gr68a         | yes                                                  |
| 13381           | CG7303        | Gr68a         | yes                                                  |
| 35240           | CG7399        | Hn            | yes                                                  |
| 28041           | CG7486        | Dredd         | yes                                                  |
| 4365            | CG8285        | boss          | yes                                                  |
| 4366            | CG8285        | boss          | yes                                                  |
| 35876           | CG8318        | Nf1           | Expected? (loss of bristles and notum malformation)  |
| 35877           | CG8318        | Nf1           | yes                                                  |
| 4867            | CG8536        | beta4GalNAcTA | yes                                                  |
| 4869            | CG8536        | beta4GalNAcTA | yes                                                  |
| 2998            | CG8631        | msl-3         | yes                                                  |
| 9827            | CG9151        | acj6          | yes                                                  |
| 29108           | CG9347        | ninaB         | yes                                                  |
| 3149            | CG9771        | Dip2          | yes                                                  |
| 3148            | CG9771        | Dip2          | yes                                                  |

Table indicates whether phenotypes in the genome-wide screen agree with published adult mutant phenotypes (or lack thereof) for a set of 43 non-essential genes. (pdf; 37 kb)



## Supplementary Table 7. Wing assay results

| Transformant ID | Lateral Inhibition | CG number 5.7    | Wing Margin Notching | Broad Delta-like Veins | Positive in Su(H) reporter assay | Bent Up (Spoon-shaped) wing | Other wing phenotype or no phenotype                     | Known Notch Pathway Gene |
|-----------------|--------------------|------------------|----------------------|------------------------|----------------------------------|-----------------------------|----------------------------------------------------------|--------------------------|
| 3774            | Yes                | CG10021          | no                   | no                     | not tested                       | no                          |                                                          |                          |
| 15425           | Yes                | CG10657          | no                   | no                     | not tested                       | no                          |                                                          |                          |
| 11257           | Yes                | CG1007           | no                   | yes, weak              | no                               | no                          | ectopic bristles                                         | yes                      |
| 35469           | Yes                | CG10108          | no                   | no                     | not tested                       | yes                         |                                                          |                          |
| 16039           | Yes                | CG10210, CG10375 | no                   | no                     | not tested                       | no                          |                                                          |                          |
| 16040           | Yes                | CG10377          | no                   | no                     | no                               | no                          | wrinkled, small                                          |                          |
| 29715           | Yes                | CG10570          | no                   | no                     | not tested                       | yes                         |                                                          |                          |
| 3326            | Yes                | CG10657          | no                   | no                     | not tested                       | no                          |                                                          |                          |
| 42245           | Yes                | CG10776          | no                   | no                     | no                               | yes                         | terminal L4 and L5 are absent                            |                          |
| 35489           | Yes                | CG10800          | yes                  | yes                    | no                               | no                          | wrinkled, small, tufts of trichomes                      |                          |
| 35490           | Yes                | CG10800          | yes                  | yes                    | no                               | no                          | wrinkled, small, tufts of trichomes                      |                          |
| 45013           | Yes                | CG10954          | no                   | no                     | not tested                       | yes                         |                                                          |                          |
| 27090           | Yes                | CG10975          | no                   | no                     | no                               | no                          |                                                          |                          |
| 40631           | Yes                | CG10975          | no                   | no                     | no                               | yes                         | darker margin                                            |                          |
| 37812           | Yes                | CG11154          | no                   | no                     | not tested                       | no                          |                                                          |                          |
| 10942           | Yes                | CG1119           | no                   | no                     | not tested                       | yes                         |                                                          |                          |
| 3046            | Yes                | CG11282          | no                   | no                     | not tested                       | no                          |                                                          |                          |
| 17541           | Yes                | CG11286          | yes                  | yes                    | yes                              | no                          |                                                          |                          |
| 39686           | Yes                | CG11286          | yes                  | yes                    | yes                              | no                          |                                                          |                          |
| 2495            | Yes                | CG11592          | no                   | no                     | not tested                       | no                          |                                                          |                          |
| 38541           | Yes                | CG11597          | no                   | no                     | not tested                       | no                          |                                                          |                          |
| 48786           | Yes                | CG11637          | no                   | no                     | not tested                       | no                          |                                                          |                          |
| 16258           | Yes                | CG11659, CG6300  | no                   | no                     | not tested                       | yes                         | wrinkled                                                 |                          |
| 16371           | Yes                | CG11940          | no                   | no                     | not tested                       | no                          | wrinkled                                                 |                          |
| 3335            | Yes                | CG11956          | no                   | no                     | not tested                       | no                          |                                                          |                          |
| 3336            | Yes                | CG11956          | no                   | no                     | not tested                       | no                          |                                                          |                          |
| 10662           | Yes                | CG11988          | no                   | no                     | not tested                       | no                          |                                                          | yes                      |
| 31121           | Yes                | CG12065          | no                   | no                     | not tested                       | no                          |                                                          |                          |
| 17043           | Yes                | CG1216           | no                   | no                     | not tested                       | no                          |                                                          |                          |
| 43112           | Yes                | CG12265          | no                   | no                     | not tested                       | no                          |                                                          |                          |
| 43113           | Yes                | CG12265          | yes                  | yes                    | no                               | no                          | wrinkled, small, tufts of trichomes                      |                          |
| 23091           | Yes                | CG12303          | no                   | no                     | not tested                       | no                          |                                                          |                          |
| 44046           | Yes                | CG12366          | yes                  | yes                    | yes                              | no                          | wrinkled, small                                          | yes                      |
| 25576           | Yes                | CG12484          | no                   | no                     | not tested                       | yes                         |                                                          |                          |
| 45761           | Yes                | CG12537          | no                   | no                     | not tested                       | no                          |                                                          |                          |
| 938             | Yes                | CG12676          | no                   | no                     | not tested                       | no                          |                                                          | yes                      |
| 31898           | Yes                | CG12818          | no                   | no                     | not tested                       | no                          |                                                          |                          |
| 46248           | Yes                | CG12818          | no                   | no                     | not tested                       | no                          |                                                          |                          |
| 15081           | Yes                | CG13208, CG7741  | no                   | no                     | not tested                       | yes or lethal               |                                                          |                          |
| 23873           | Yes                | CG13349          | no                   | no                     | not tested                       | no                          |                                                          |                          |
| 32194           | Yes                | CG13472          | no                   | no                     | not tested                       | yes                         |                                                          |                          |
| 43848           | Yes                | CG13586          | no                   | no                     | not tested                       | yes                         |                                                          |                          |
| 17334           | Yes                | CG13623          | no                   | no                     | not tested                       | yes                         |                                                          |                          |
| 17690           | Yes                | CG13708          | no                   | no                     | not tested                       | no                          |                                                          |                          |
| 24481           | Yes                | CG13827          | no                   | no                     | not tested                       | no                          |                                                          |                          |
| 38003           | Yes                | CG13983          | no                   | no                     | not tested                       | no                          |                                                          |                          |
| 17340           | Yes                | CG14011          | no                   | no                     | not tested                       | no                          |                                                          |                          |
| 45414           | Yes                | CG14011          | no                   | no                     | no                               | yes                         | thin                                                     |                          |
| 17349           | Yes                | CG14039          | yes                  | yes                    | no                               | no                          |                                                          |                          |
| 17471           | Yes                | CG14299          | no                   | no                     | not tested                       | no                          |                                                          |                          |
| 32278           | Yes                | CG14544          | no                   | no                     | not tested                       | no                          |                                                          |                          |
| 43588           | Yes                | CG14549          | no                   | no                     | not tested                       | yes                         |                                                          |                          |
| 44064           | Yes                | CG14624          | no                   | yes                    | no                               | yes                         |                                                          |                          |
| 44065           | Yes                | CG14624          | no                   | no                     | not tested                       | no                          |                                                          |                          |
| 37737           | Yes                | CG14999          | no                   | no                     | not tested                       | yes                         |                                                          |                          |
| 28552           | Yes                | CG15292          | no                   | no                     | not tested                       | no                          | wrinkled                                                 |                          |
| 14645           | Yes                | CG15307          | no                   | no                     | not tested                       | no                          | sprouting vein (L3)                                      |                          |
| 43402           | Yes                | CG15330          | no                   | no                     | not tested                       | no                          |                                                          |                          |
| 11245           | Yes                | CG15367          | no                   | no                     | no                               | no                          | wrinkled, supernumary trichomes                          |                          |
| 27045           | Yes                | CG15427          | no                   | no                     | not tested                       | yes                         |                                                          |                          |
| 20205           | Yes                | CG15429          | no                   | no                     | not tested                       | no                          |                                                          |                          |
| 40877           | Yes                | CG15443          | no                   | no                     | not tested                       | no                          |                                                          |                          |
| 40024           | Yes                | CG15753          | no                   | no                     | not tested                       | yes                         |                                                          |                          |
| 14404           | Yes                | CG15769          | no                   | no                     | not tested                       | yes                         |                                                          |                          |
| 33846           | No                 | CG16713          | no                   | no                     | not tested                       | no                          |                                                          |                          |
| 32767           | Yes                | CG16908          | no                   | no                     | not tested                       | yes                         |                                                          |                          |
| 28758           | Yes                | CG17060          | no                   | no                     | not tested                       | no                          |                                                          |                          |
| 14194           | Yes                | CG17091          | no                   | no                     | not tested                       | no                          |                                                          |                          |
| 27058           | Yes                | CG17559          | no                   | no                     | not tested                       | yes                         |                                                          |                          |
| 3861            | Yes                | CG17928          | no                   | no                     | no                               | no                          | wrinkled margin                                          |                          |
| 969             | Yes                | CG1804           | no                   | no                     | no                               | no                          | wrinkled margin                                          |                          |
| 27185           | No                 | CG1804           | no                   | no                     | no                               | no                          |                                                          |                          |
| 40137           | Yes                | CG18214          | no                   | no                     | not tested                       | no                          |                                                          |                          |
| 12821           | No                 | CG18332          | no                   | yes                    | no                               | no                          | wrinkled, thin, necrotic, ectopic bristles               |                          |
| 12822           | Yes                | CG18332          | no                   | no                     | not tested                       | no                          |                                                          |                          |
| 46043           | Yes                | CG18582, CG4013  | no                   | yes, weak              | no                               | no                          | flattened border                                         |                          |
| 46044           | Yes                | CG18582, CG4013  | no                   | no                     | not tested                       | no                          |                                                          |                          |
| 43082           | Yes                | CG18803          | no                   | yes                    | no                               | yes                         |                                                          | yes                      |
| 20799           | Yes                | CG2091           | no                   | no                     | no                               | yes                         | flattened margin (weak)                                  |                          |
| 20826           | Yes                | CG2161           | no                   | no                     | no                               | no                          | furrows                                                  |                          |
| 20829           | Yes                | CG2179           | no                   | no                     | no                               | yes                         |                                                          |                          |
| 13762           | Yes                | CG2183           | no                   | no                     | not tested                       | no                          |                                                          |                          |
| 20849           | Yes                | CG2222           | no                   | no                     | no                               | yes                         | altered pattern of hairs; parts of wing are delaminating |                          |
| 33509           | Yes                | CG2257           | no                   | no                     | not tested                       | no                          | wings bent down                                          |                          |
| 33810           | Yes                | CG2257           | no                   | no                     | no                               | no                          | wings bent down, wrinkled, necrotic                      |                          |
| 7035            | Yes                | CG2338           | no                   | no                     | not tested                       | no                          |                                                          |                          |
| 21763           | Yes                | CG2950           | no                   | no                     | not tested                       | no                          |                                                          |                          |
| 43880           | Yes                | CG30023, CG4013  | no                   | no                     | no                               | yes                         |                                                          |                          |
| 44747           | Yes                | CG30182          | no                   | no                     | not tested                       | yes or lethal               |                                                          |                          |
| 35799           | Yes                | CG30321          | no                   | no                     | not tested                       | no                          |                                                          |                          |
| 29193           | Yes                | CG30470          | no                   | no                     | no                               | yes                         | wrinkled, small                                          |                          |
| 33739           | Yes                | CG31007          | no                   | yes, weak              | no                               | no                          |                                                          |                          |
| 38854           | Yes                | CG31012          | no                   | no                     | not tested                       | no                          |                                                          |                          |
| 40207           | Yes                | CG31122          | no                   | no                     | not tested                       | no                          |                                                          |                          |
| 27194           | Yes                | CG31140          | no                   | no                     | not tested                       | yes                         |                                                          |                          |
| 14727           | Yes                | CG31238          | no                   | no                     | no                               | yes                         |                                                          |                          |
| 9075            | Yes                | CG31292, CG3303  | no                   | no                     | not tested                       | yes                         |                                                          |                          |
| 43430           | Yes                | CG31389          | no                   | no                     | not tested                       | no                          |                                                          |                          |
| 30545           | Yes                | CG31612          | no                   | no                     | not tested                       | no                          |                                                          |                          |
| 9425            | Yes                | CG31781          | no                   | no                     | not tested                       | yes or lethal               |                                                          |                          |
| 8234            | Yes                | CG32060          | no                   | no                     | not tested                       | no                          |                                                          |                          |
| 34408           | Yes                | CG32130          | no                   | yes, weak              | no                               | yes                         |                                                          |                          |
| 37441           | Yes                | CG32136          | yes                  | yes                    | no                               | no                          | wrinkled, small, ectopic bristles                        |                          |
| 34446           | Yes                | CG32203          | no                   | no                     | not tested                       | no                          |                                                          |                          |
| 14339           | Yes                | CG32206          | no                   | no                     | not tested                       | no                          |                                                          |                          |
| 41875           | Yes                | CG32315          | no                   | no                     | not tested                       | yes                         |                                                          |                          |
| 41876           | Yes                | CG32315          | no                   | no                     | not tested                       | yes                         |                                                          |                          |
| 45459           | Yes                | CG32315          | no                   | no                     | not tested                       | yes                         | wrinkled                                                 |                          |
| 24740           | Yes                | CG32346          | no                   | no                     | not tested                       | yes                         |                                                          |                          |
| 7255            | Yes                | CG32483          | no                   | no                     | not tested                       | yes                         |                                                          |                          |
| 18140           | Yes                | CG32498          | no                   | no                     | not tested                       | yes                         |                                                          |                          |
| 27035           | Yes                | CG32676          | no                   | no                     | not tested                       | yes                         |                                                          |                          |
| 45071           | Yes                | CG32717          | no                   | no                     | not tested                       | yes                         | thin                                                     |                          |
| 19428           | Yes                | CG32717, CG4013  | yes                  | yes, weak              | no                               | yes                         | furrows                                                  |                          |
| 25620           | Yes                | CG32732          | no                   | no                     | not tested                       | yes                         |                                                          |                          |
| 43370           | Yes                | CG32813          | no                   | no                     | not tested                       | yes                         | furrows                                                  |                          |
| 43751           | Yes                | CG3298           | no                   | no                     | no                               | no                          | necrotic                                                 |                          |
| 29542           | Yes                | CG33106, CG4013  | no                   | no                     | not tested                       | yes                         |                                                          |                          |
| 24801           | Yes                | CG33193          | no                   | no                     | not tested                       | yes                         |                                                          |                          |
| 28623           | Yes                | CG33196          | no                   | no                     | not tested                       | no                          | only 1 male adult, wrinkled, blistered, small            |                          |
| 32275           | Yes                | CG33203          | no                   | no                     | not tested                       | yes                         |                                                          |                          |
| 21435           | Yes                | CG33205          | no                   | no                     | not tested                       | yes                         |                                                          |                          |
| 50497           | Yes                | CG33270          | no                   | no                     | no                               | no                          | wrinkled, small                                          |                          |
| 47834           | Yes                | CG33324          | no                   | yes                    | no                               | no                          |                                                          |                          |

Supplementary Table 7.

| Transformant ID | Lateral Inhibition | CG number 5.7   | Wing Margin Notching | Broad Delta-like Veins | Positive in Su(H) reporter assay | Bent Up (Spoon-shaped) wing | Other wing phenotype or no phenotype                           | Known Notch Pathway Gene |
|-----------------|--------------------|-----------------|----------------------|------------------------|----------------------------------|-----------------------------|----------------------------------------------------------------|--------------------------|
| 47835           | Yes                | CG33324         | no                   | yes                    | no                               | no                          | thin                                                           |                          |
| 48476           | Yes                | CG33688         | no                   | no                     | not tested                       | no                          | sprouting vein (L4)                                            |                          |
| 45652           | Yes                | CG33696         | no                   | no                     | not tested                       | yes                         |                                                                |                          |
| 33197           | Yes                | CG34315, CG4088 | no                   | no                     | not tested                       | yes                         |                                                                |                          |
| 45670           | Yes                | CG34319         | no                   | no                     | not tested                       | yes                         |                                                                |                          |
| 25197           | Yes                | CG34341         | no                   | yes, weak              | no                               | no                          |                                                                |                          |
| 12475           | Yes                | CG34343, CG4013 | no                   | no                     | not tested                       | yes                         |                                                                |                          |
| 20105           | Yes                | CG34345         | yes                  | yes                    | yes                              | no                          |                                                                |                          |
| 10133           | Yes                | CG3443          | no                   | no                     | not tested                       | yes                         |                                                                |                          |
| 3720            | Yes                | CG3619          | yes                  | yes                    | no                               | no                          |                                                                | yes                      |
| 27187           | Yes                | CG3619          | yes                  | yes                    | no                               | no                          | thin                                                           | yes                      |
| 37287           | Yes                | CG3619          | yes                  | yes                    | not tested                       | no                          | wrinkled, blistered                                            | yes                      |
| 37288           | Yes                | CG3619          | yes                  | yes                    | no                               | no                          | wrinkled, blistered                                            | yes                      |
| 28359           | Yes                | CG3690          | no                   | no                     | not tested                       | no                          |                                                                |                          |
| 34719           | Yes                | CG3845          | no                   | no                     | not tested                       | yes                         | wrinkled                                                       |                          |
| 11270           | Yes                | CG3891          | no                   | no                     | no                               | yes                         |                                                                |                          |
| 29574           | Yes                | CG3927          | no                   | no                     | not tested                       | no                          |                                                                |                          |
| 1112            | Yes                | CG3936          | yes                  | yes                    | yes                              | no                          | wrinkled                                                       | yes                      |
| 27228           | Yes                | CG3936          | yes                  | yes                    | yes                              | no                          | wrinkled, small                                                | yes                      |
| 27229           | Yes                | CG3936          | yes                  | yes                    | yes                              | no                          | wrinkled                                                       | yes                      |
| 19339           | Yes                | CG4013          | no                   | no                     | not tested                       | yes                         |                                                                |                          |
| 13716           | Yes                | CG4013, CG8254  | no                   | no                     | not tested                       | no                          |                                                                |                          |
| 13661           | Yes                | CG4039          | no                   | no                     | no                               | no                          | furrows                                                        |                          |
| 27223           | Yes                | CG4125          | no                   | no                     | not tested                       | no                          |                                                                |                          |
| 6248            | Yes                | CG4158          | no                   | yes, weak              | no                               | no                          |                                                                |                          |
| 35583           | Yes                | CG4178          | no                   | no                     | not tested                       | no                          |                                                                |                          |
| 26505           | Yes                | CG4311          | no                   | no                     | not tested                       | no                          |                                                                |                          |
| 35385           | Yes                | CG4412          | no                   | no                     | not tested                       | no                          | wrinkled, small                                                |                          |
| 3238            | Yes                | CG4531          | no                   | yes                    | no                               | no                          |                                                                |                          |
| 8893            | Yes                | CG4722          | no                   | no                     | no                               | yes                         | wrinkled                                                       | yes                      |
| 34893           | Yes                | CG4733          | no                   | no                     | not tested                       | yes                         |                                                                |                          |
| 34894           | Yes                | CG4733          | no                   | no                     | not tested                       | yes                         |                                                                |                          |
| 21536           | Yes                | CG4760          | no                   | no                     | not tested                       | yes                         |                                                                |                          |
| 2842            | Yes                | CG4862          | no                   | no                     | not tested                       | yes                         |                                                                |                          |
| 34953           | Yes                | CG5165          | no                   | no                     | not tested                       | no                          |                                                                |                          |
| 37761           | Yes                | CG5313          | no                   | no                     | not tested                       | yes                         |                                                                |                          |
| 41437           | Yes                | CG5362          | no                   | no                     | not tested                       | yes                         | wrinkled                                                       |                          |
| 11570           | Yes                | CG5488          | no                   | no                     | not tested                       | no                          |                                                                |                          |
| 45569           | Yes                | CG5609          | yes                  | yes                    | yes                              | no                          |                                                                |                          |
| 34138           | Yes                | CG5874          | no                   | no                     | not tested                       | yes                         |                                                                |                          |
| 27526           | Yes                | CG5841          | yes                  | yes                    | yes                              | no                          | blistered, ectopic bristles                                    | yes                      |
| 32421           | Yes                | CG5940          | no                   | no                     | no                               | no                          | wrinkled, small, tufts of trichomes                            |                          |
| 41397           | Yes                | CG5953          | no                   | no                     | no                               | yes                         |                                                                |                          |
| 27566           | Yes                | CG6098          | no                   | no                     | not tested                       | no                          |                                                                |                          |
| 27567           | Yes                | CG6098          | no                   | no                     | not tested                       | no                          |                                                                |                          |
| 4301            | Yes                | CG6124          | no                   | no                     | not tested                       | no                          |                                                                |                          |
| 10639           | Yes                | CG6146          | no                   | no                     | not tested                       | yes                         |                                                                |                          |
| 40354           | Yes                | CG6255          | no                   | no                     | not tested                       | no                          |                                                                |                          |
| 30274           | Yes                | CG6308          | no                   | no                     | not tested                       | no                          |                                                                |                          |
| 27577           | Yes                | CG6315          | no                   | no                     | not tested                       | yes                         |                                                                |                          |
| 27578           | Yes                | CG6315          | no                   | no                     | not tested                       | yes                         |                                                                |                          |
| 27625           | Yes                | CG6444          | no                   | no                     | not tested                       | yes                         |                                                                |                          |
| 37988           | Yes                | CG6453          | no                   | no                     | not tested                       | no                          |                                                                |                          |
| 22496           | Yes                | CG6509          | no                   | no                     | no                               | no                          | thin                                                           |                          |
| 42799           | Yes                | CG6627          | no                   | no                     | not tested                       | no                          |                                                                |                          |
| 35123           | Yes                | CG6838          | no                   | no                     | not tested                       | no                          |                                                                |                          |
| 22704           | Yes                | CG6883          | no                   | no                     | not tested                       | yes                         |                                                                |                          |
| 34382           | Yes                | CG6889          | no                   | no                     | not tested                       | no                          |                                                                |                          |
| 6313            | Yes                | CG6975          | no                   | no                     | not tested                       | yes                         | wrinkled                                                       |                          |
| 41858           | Yes                | CG7015          | no                   | no                     | not tested                       | yes                         |                                                                |                          |
| 37553           | Yes                | CG7417          | no                   | no                     | not tested                       | no                          |                                                                |                          |
| 37555           | Yes                | CG7417          | no                   | no                     | not tested                       | no                          |                                                                |                          |
| 14399           | Yes                | CG7454          | no                   | no                     | not tested                       | no                          |                                                                |                          |
| 13041           | Yes                | CG7631          | no                   | no                     | not tested                       | no                          | wrinkled, small, ectopic bristles, vein material in E cell     |                          |
| 12429           | Yes                | CG7655          | no                   | no                     | not tested                       | no                          |                                                                |                          |
| 43649           | Yes                | CG7668          | no                   | yes                    | no                               | yes                         | ectopic bristles, marginal sensory bristles partially deformed |                          |
| 14392           | Yes                | CG7714          | no                   | no                     | not tested                       | no                          |                                                                |                          |
| 40322           | Yes                | CG7883          | no                   | no                     | not tested                       | yes                         | small, wing margin is less brown and narrower                  |                          |
| 38963           | Yes                | CG7935          | yes                  | yes, weak              | no                               | yes                         |                                                                |                          |
| 23675           | Yes                | CG8021          | yes                  | yes                    | yes                              | no                          |                                                                |                          |
| 38338           | Yes                | CG8094          | no                   | no                     | not tested                       | yes                         |                                                                |                          |
| 23748           | Yes                | CG8136          | yes                  | yes                    | yes                              | yes                         | thin                                                           |                          |
| 10881           | Yes                | CG8142          | no                   | no                     | not tested                       | yes                         | wrinkled margin                                                |                          |
| 24253           | Yes                | CG8239          | no                   | no                     | not tested                       | yes                         |                                                                |                          |
| 20210           | Yes                | CG8355          | no                   | yes, weak              | no                               | no                          |                                                                |                          |
| 38233           | Yes                | CG8355          | no                   | yes, weak              | no                               | no                          |                                                                |                          |
| 6315            | Yes                | CG8384          | no                   | no                     | not tested                       | no                          |                                                                | yes                      |
| 6316            | Yes                | CG8384          | no                   | yes, weak              | no                               | yes                         |                                                                | yes                      |
| 35922           | Yes                | CG8386          | no                   | no                     | not tested                       | yes or lethal               |                                                                |                          |
| 28243           | Yes                | CG8472          | no                   | no                     | no                               | no                          | wrinkled, small                                                |                          |
| 28908           | Yes                | CG8489          | no                   | no                     | not tested                       | no                          |                                                                |                          |
| 50350           | Yes                | CG8556          | no                   | no                     | not tested                       | no                          |                                                                |                          |
| 28942           | Yes                | CG8725          | no                   | no                     | not tested                       | yes                         |                                                                |                          |
| 45988           | Yes                | CG8743          | no                   | no                     | not tested                       | yes or lethal               | larger                                                         |                          |
| 45989           | Yes                | CG8743          | no                   | no                     | no                               | yes                         |                                                                |                          |
| 28247           | Yes                | CG8765          | no                   | no                     | not tested                       | no                          |                                                                |                          |
| 37975           | Yes                | CG8946          | no                   | no                     | not tested                       | no                          |                                                                |                          |
| 42182           | Yes                | CG8994          | no                   | no                     | not tested                       | no                          |                                                                |                          |
| 23335           | Yes                | CG9032          | no                   | no                     | not tested                       | no                          |                                                                |                          |
| 23685           | Yes                | CG9032          | no                   | no                     | not tested                       | yes                         | wrinkled                                                       |                          |
| 40837           | Yes                | CG9194          | no                   | no                     | not tested                       | no                          |                                                                |                          |
| 42211           | Yes                | CG9249          | no                   | no                     | not tested                       | no                          | wrinkled, parts of wing are delaminating                       |                          |
| 47643           | No                 | CG9249          | no                   | no                     | not tested                       | yes                         |                                                                |                          |
| 28962           | Yes                | CG9270          | no                   | no                     | not tested                       | no                          |                                                                |                          |
| 15347           | Yes                | CG9415          | no                   | no                     | not tested                       | no                          | wrinkled, blistered, small                                     |                          |
| 15337           | Yes                | CG9473          | no                   | no                     | not tested                       | no                          | wrinkled                                                       |                          |
| 8329            | Yes                | CG9518          | no                   | no                     | not tested                       | no                          | additional vein parallel to L3                                 |                          |
| 27026           | Yes                | CG9596          | no                   | no                     | not tested                       | no                          |                                                                |                          |
| 24193           | Yes                | CG9731          | no                   | no                     | not tested                       | yes or lethal               |                                                                |                          |
| 13779           | Yes                | CG9788          | no                   | no                     | not tested                       | no                          |                                                                |                          |
| 39205           | Yes                | CG9802          | no                   | yes                    | no                               | yes                         | wrinkled, small, ectopic bristles, supernumary trichomes       |                          |
| 2575            | Yes                | CG9964          | no                   | no                     | not tested                       | no                          |                                                                |                          |

Results of the *MS1096*-GAL4 wing secondary screen describing phenotypes in wing margin notching, wing vein broadening and other phenotypes for genes in the lateral inhibition category. Results of the Su(H)-*lacZ* reporter assay for genes whose knockdown caused wing margin notching or broad wing vein phenotypes in the *MS1096*-GAL4 secondary screen are also included. (pdf; 71 kb)

**Supplementary Table 8. Live imaging analysis for SOP specification results**

| Transformant ID | CG Number 5.7   | Loss of Bristles | Phenotype in Live Imaging Assay | Positive Control Gene? |
|-----------------|-----------------|------------------|---------------------------------|------------------------|
| 35469           | CG10108         | 9.0              | too many SOP cells              | no                     |
| 29715           | CG10570         | 10.0             | no SOP cells                    | no                     |
| 3326            | CG10657         | 7.0              | normal number, size SOP cells   | no                     |
| 42245           | CG10776         | 9.0              | no SOP cells                    | no                     |
| 35489           | CG10800         | 10.0             | no SOP cells                    | no                     |
| 35490           | CG10800         | 9.0              | few SOP cells, big SOP cells    | no                     |
| 37812           | CG11154         | 9.0              | small SOP cells                 | no                     |
| 10942           | CG1119          | 8.0              | normal number, size SOP cells   | no                     |
| 3046            | CG11282         | 8.0              | normal number, size SOP cells   | no                     |
| 2495            | CG11592         | 9.0              | lethal                          | no                     |
| 38541           | CG11597         | 10.0             | no SOP cells                    | no                     |
| 43112           | CG12265         | 10.0             | few SOP cells, big SOP cells    | no                     |
| 43113           | CG12265         | 10.0             | few SOP cells, big SOP cells    | no                     |
| 23091           | CG12333         | 9.0              | no SOP cells                    | no                     |
| 31741           | CG12352         | 7.0              | normal number, size SOP cells   | no                     |
| 44046           | CG12366         | 9.0              | too many SOP cells              | yes, Notch             |
| 17334           | CG13623         | 7.0              | normal number, size SOP cells   | no                     |
| 17690           | CG13708         | 10.0             | no SOP cells                    | no                     |
| 24481           | CG13827         | 10.0             | no SOP cells                    | no                     |
| 17471           | CG14299         | 10.0             | no SOP cells                    | no                     |
| 32278           | CG14544         | 9.0              | normal number, size SOP cells   | no                     |
| 32279           | CG14544         | 8.0              | normal number, size SOP cells   | no                     |
| 43588           | CG14549         | 8.0              | normal number, size SOP cells   | no                     |
| 37757           | CG14999         | 8.0              | normal number, size SOP cells   | no                     |
| 28552           | CG15292         | 8.0              | normal number, size SOP cells   | no                     |
| 14645           | CG15307         | 10.0             | no SOP cells                    | no                     |
| 11245           | CG15367         | 9.0              | normal number, size SOP cells   | no                     |
| 20205           | CG15429         | 10.0             | no SOP cells                    | no                     |
| 40877           | CG15443         | 9.0              | no SOP cells                    | no                     |
| 14404           | CG15769         | 7.0              | few SOP cells                   | no                     |
| 32767           | CG16908         | 10.0             | normal number, size SOP cells   | no                     |
| 14194           | CG17081         | 10.0             | no SOP cells                    | no                     |
| 40137           | CG18214         | 9.0              | few SOP cells                   | no                     |
| 43082           | CG18803         | 9.0              | too many SOP cells              | yes, Notch             |
| 13762           | CG2183          | 8.0              | normal number, size SOP cells   | no                     |
| 20849           | CG2222          | 9.0              | normal number, size SOP cells   | no                     |
| 7035            | CG2938          | 9.0              | no SOP cells                    | no                     |
| 44747           | CG30182         | 9.0              | normal number, size SOP cells   | no                     |
| 35799           | CG30321         | 10.0             | no SOP cells                    | no                     |
| 30545           | CG31612         | 9.0              | no SOP cells                    | no                     |
| 9425            | CG31781         | 8.0              | normal number, size SOP cells   | no                     |
| 34446           | CG32203         | 9.0              | no SOP cells                    | no                     |
| 14339           | CG32206         | 9.0              | no SOP cells                    | no                     |
| 41875           | CG32315         | 8.0              | normal number, size SOP cells   | no                     |
| 41876           | CG32315         | 8.0              | normal number, size SOP cells   | no                     |
| 45459           | CG32315         | 8.0              | normal number, size SOP cells   | no                     |
| 7255            | CG32463         | 10.0             | no SOP cells                    | no                     |
| 43370           | CG32813         | 10.0             | no SOP cells                    | no                     |
| 43751           | CG3298          | 9.0              | lethal                          | no                     |
| 48476           | CG33688         | 10.0             | no SOP cells                    | no                     |
| 33197           | CG34315, CG4088 | 7.0              | normal number, size SOP cells   | no                     |
| 18682           | CG34345         | 8.0              | too many SOP cells              | no                     |
| 20105           | CG34345         | 9.0              | too many SOP cells              | no                     |
| 27187           | CG3619          | 8.0              | too many SOP cells              | yes, Notch, ACD        |
| 37287           | CG3619          | 7.0              | too many SOP cells              | yes, Notch, ACD        |
| 37288           | CG3619          | 8.0              | too many SOP cells              | yes, Notch, ACD        |
| 28359           | CG3690          | 10.0             | no SOP cells                    | no                     |
| 29674           | CG3927          | 8.0              | normal number, size SOP cells   | no                     |
| 1112            | CG3936          | 9.0              | too many SOP cells              | yes, Notch, ACD        |
| 27228           | CG3936          | 9.0              | too many SOP cells              | yes, Notch, ACD        |

Supplementary Table 8.

| Transformant ID | CG Number 5.7 | Loss of Bristles | Phenotype in Live Imaging Assay | Positive Control Gene? |
|-----------------|---------------|------------------|---------------------------------|------------------------|
| 27229           | CG3936        | 10.0             | too many SOP cells              | yes, Notch, ACD        |
| 13661           | CG4039        | 9.0              | normal number, size SOP cells   | no                     |
| 35583           | CG4178        | 10.0             | no SOP cells                    | no                     |
| 35385           | CG4412        | 9.0              | no SOP cells                    | no                     |
| 3238            | CG4531        | 7.0              | too many SOP cells              | no                     |
| 21536           | CG4760        | 8.0              | few SOP cells                   | no                     |
| 34953           | CG5165        | 9.0              | no SOP cells                    | no                     |
| 37761           | CG5313        | 8.0              | normal number, size SOP cells   | no                     |
| 32421           | CG5940        | 10.0             | few SOP cells, big SOP cells    | yes, ACD               |
| 27566           | CG6098        | 9.0              | normal number, size SOP cells   | no                     |
| 27567           | CG6098        | 9.0              | normal number, size SOP cells   | no                     |
| 30274           | CG6308        | 9.0              | no SOP cells                    | no                     |
| 42799           | CG6627        | 9.0              | no SOP cells                    | no                     |
| 35123           | CG6838        | 10.0             | no SOP cells                    | no                     |
| 14099           | CG7454        | 9.0              | no SOP cells                    | no                     |
| 12429           | CG7655        | 9.0              | no SOP cells                    | no                     |
| 14392           | CG7714        | 10.0             | no SOP cells                    | no                     |
| 40322           | CG7883        | 9.0              | lethal                          | no                     |
| 38963           | CG7935        | 7.0              | small SOP cells                 | no                     |
| 35338           | CG8094        | 7.0              | normal number, size SOP cells   | no                     |
| 10881           | CG8142        | 7.0              | normal number, size SOP cells   | no                     |
| 24253           | CG8239        | 7.0              | normal number, size SOP cells   | no                     |
| 28243           | CG8472        | 10.0             | no SOP cells                    | no                     |
| 50350           | CG8556        | 9.0              | lethal                          | no                     |
| 28247           | CG8765        | 9.0              | no SOP cells                    | no                     |
| 23335           | CG9032        | 9.0              | normal number, size SOP cells   | no                     |
| 23685           | CG9032        | 9.0              | few SOP cells                   | no                     |
| 42211           | CG9249        | 8.0              | normal number, size SOP cells   | no                     |
| 29962           | CG9270        | 10.0             | no SOP cells                    | no                     |
| 27026           | CG9596        | 9.0              | normal number, size SOP cells   | no                     |
| 24193           | CG9731        | 9.0              | too many SOP cells              | no                     |

Live imaging secondary screen results indicating phenotypes observed on SOP number and size for knockdown of genes with  $P_{Loss} \geq 7$  in the genome-wide screen.

(pdf; 45 kb)

**Supplementary Table 9. Lineage analysis results**

| <b>TransformantID</b> | <b>CG Number 5.7</b> | <b>Phenotype in Lineage Staining</b>                             |
|-----------------------|----------------------|------------------------------------------------------------------|
| 3326                  | CG10657              | notum too malformed to get good staining                         |
| 10942                 | CG1119               | less than 4 cells per organ                                      |
| 3046                  | CG11282              | cell fate transformation, 2 neuron 2 sheath or 3 neuron 1 sheath |
| 31741                 | CG12352              | notum too malformed, potential rare cell fate transformation     |
| 32278                 | CG14544              | no phenotype - could be differentiation problem                  |
| 32279                 | CG14544              | no phenotype - could be differentiation problem                  |
| 43588                 | CG14549              | less than 4 cells per organ                                      |
| 37757                 | CG14999              | no phenotype - could be differentiation problem                  |
| 28552                 | CG15292              | unhealthy cells- weak cut staining, otherwise no phenotype       |
| 11245                 | CG15367              | less than 4 cells per organ                                      |
| 32767                 | CG16908              | cell fate transformation, 2 neuron 2 sheath or 3 neuron 1 sheath |
| 13762                 | CG2183               | cell fate transformation, 2 neuron 2 sheath                      |
| 20849                 | CG2222               | less than 4 cells per organ                                      |
| 45459                 | CG32315              | very few unhealthy cells, otherwise no phenotype                 |
| 41875                 | CG32315              | unhealthy cells                                                  |
| 41876                 | CG32315              | unhealthy cells                                                  |
| 33197                 | CG34315, CG4088      | less than 4 cells per organ                                      |
| 29674                 | CG3927               | cell fate transformation, 2 neuron 2 sheath or 3 neuron 1 sheath |
| 37761                 | CG5313               | less than 4 cells per organ                                      |
| 27566                 | CG6098               | less than 4 cells per organ                                      |
| 27567                 | CG6098               | less than 4 cells per organ                                      |
| 35338                 | CG8094               | cell fate transformation, 2 neuron 2 sheath or 3 neuron 1 sheath |
| 10881                 | CG8142               | no phenotype - could be differentiation problem                  |
| 24253                 | CG8239               | no phenotype - could be differentiation problem                  |
| 42211                 | CG9249               | cell fate transformation, 2 neuron 2 sheath or 3 neuron 1 sheath |
| 27026                 | CG9596               | no phenotype - could be differentiation problem                  |

Results of antibody staining lineage analysis are indicated for genes with no apparent phenotype in the live imaging secondary screen. **(pdf; 34 kb)**

**Supplementary Table 10. Primer Sequences for Custom Second RNAi lines**

| <i>RNAi line ID</i> | <i>CG number 5.7</i> | <i>Primer 1 Sequence</i>          | <i>Primer 2 Sequence</i>              |
|---------------------|----------------------|-----------------------------------|---------------------------------------|
| 1B1<br>T1           | CG10261              | GCGTCTAGAATGCAGAAAATGCCCTCGCAAAT  | CGCGAATTCAATCCCGGCGCTTGAGGAAC         |
| 1B1<br>T2           | CG10261              | GCGTCTAGAATGCAGAAAATGCCCTCGCAAAT  | CGCGAATTCAATCCCGGCGCTTGAGGAAC         |
| 1A3-<br>5 T1        | CG11988              | GCGTCTAGACGACCAGCAGAGCACCGATT     | CGCGAATTCTGGTGTAGGTGCGGATGACG         |
| 1G3<br>1 T1         | CG12366              | GCGTCTAGAGTGAGAGCCTGTGAGCACGTCAAG | CGCGAATTCGATAAAGTGGTTCGACTGTCCGAGAATG |
| 1G3<br>1 T2         | CG12366              | GCGTCTAGAGTGAGAGCCTGTGAGCACGTCAAG | CGCGAATTCGATAAAGTGGTTCGACTGTCCGAGAATG |
| 1D4<br>b) T1        | CG13983              | GCGTCTAGACGCCACTCTGGTTGCCTTTTG    | CGCGAATTCTGCATGTTGTTGGGGTTGATGA       |
| 1E8<br>3 T1         | CG34409              | GCGTCTAGAGATTTGGGATGGTGCGGATAGTGA | CGCGAATTCAGGGGGCGGACCTTGATCT          |
| 1E8<br>5 T1         | CG34409              | GCGTCTAGAGATTTGGGATGGTGCGGATAGTGA | CGCGAATTCAGGGGGCGGACCTTGATCT          |
| 1E8<br>5 T2         | CG34409              | GCGTCTAGAGATTTGGGATGGTGCGGATAGTGA | CGCGAATTCAGGGGGCGGACCTTGATCT          |
| 1A10<br>T1          | CG3619               | GCGTCTAGAGCGGACGAGTGCTCATGTACGG   | CGCGAATTCGACCACGGATCGCTGCTGTTG        |
| 1A10<br>T2          | CG3619               | GCGTCTAGAGCGGACGAGTGCTCATGTACGG   | CGCGAATTCGACCACGGATCGCTGCTGTTG        |
| 1G11<br>T1          | CG5070               | GCGTCTAGACCCTAGCGAAGCCGGGAGAAG    | CGCGAATTCGCCACAAAGCCGCTGGAATA         |
| 1G11<br>T2          | CG5070               | GCGTCTAGACCCTAGCGAAGCCGGGAGAAG    | CGCGAATTCGCCACAAAGCCGCTGGAATA         |
| 1C12<br>a) T1       | CG5441               | GCGTCTAGAGCCAGAGCGGACTCCAA        | CGCGAATTCGCTTCGGGAACACAATGCCCTCA      |
| 1D12<br>T1          | CG5460               | GCGTCTAGAACAACGGCAGCAGCAGCAATAAC  | CGCGAATTCGTGGGCTTGGACGCAGTAGCTC       |
| 1D12<br>T2          | CG5460               | GCGTCTAGAACAACGGCAGCAGCAGCAATAAC  | CGCGAATTCGTGGGCTTGGACGCAGTAGCTC       |
| 2B1<br>T2           | CG5857               | GCGTCTAGAACCCGAAGGTGCCAAGACGAC    | CGCGAATTCAGTTCCTCTCCAGGGGGTAGCA       |
| 2G1<br>T1           | CG6202               | GCGTCTAGAGGAGGATGTGGCGGAACAGGT    | CGCGAATTCGCAGTAGGGCTCCGATGAGTGC       |
| 2G1<br>T2           | CG6202               | GCGTCTAGAGGAGGATGTGGCGGAACAGGT    | CGCGAATTCGCAGTAGGGCTCCGATGAGTGC       |
